1 **Development of caecaloids to study host-pathogen interactions: new insights into**  
2 **immunoregulatory functions of *Trichuris muris* extracellular vesicles in the caecum**

3

4 María A. Duque-Correa<sup>a\*</sup>, Fernanda Schreiber<sup>a1</sup>, Faye H. Rodgers<sup>a</sup>, David Goulding<sup>a</sup>, Sally  
5 Forrest<sup>a,2</sup>, Ruby White<sup>b</sup>, Amy Buck<sup>b</sup>, Richard K. Grencis<sup>c</sup>, Matthew Berriman<sup>a</sup>

6

7 <sup>a</sup>Wellcome Sanger Institute, Wellcome Genome Campus, Hinxton, CB10 1SA, UK.

8 <sup>b</sup>Institute of Immunology & Infection Research, School of Biological Sciences, University of  
9 Edinburgh, Edinburgh, EH9 3FL

10 <sup>c</sup>Lydia Becker Institute of Immunology and Inflammation, Wellcome Trust Centre for Cell  
11 Matrix Research and Faculty of Biology, Medicine and Health, University of Manchester,  
12 Manchester, UK.

13 <sup>1</sup>Present Address: Microbiotica, Biodata Innovation Centre, Wellcome Genome Campus,  
14 Hinxton, CB10 1DR, UK

15 <sup>2</sup>Present Address: Cambridge Institute of Therapeutic Immunology and Infectious Disease,  
16 University of Cambridge, CB2 0AW

17 \***Corresponding author. E-mail:** [md19@sanger.ac.uk](mailto:md19@sanger.ac.uk)

18

19 Declarations of interest: none

20

21 **ABSTRACT**

22 The caecum, an intestinal appendage in the junction of the small and large intestines,  
23 displays a unique epithelium that serves as an exclusive niche for a range of pathogens  
24 including whipworms (*Trichuris spp*). While protocols to grow organoids from small  
25 intestine (enteroids) and colon (colonoids) exist, the conditions to culture organoids from  
26 the caecum have yet to be described. Here, we report methods to grow, differentiate and  
27 characterise mouse adult stem cell-derived caecal organoids, termed caecaloids. We  
28 compare the cellular composition of caecaloids to that of enteroids identifying differences  
29 in intestinal epithelial cell (IEC) populations that mimic those found in the caecum and  
30 small intestine. The remarkable similarity in the IECs composition and spatial conformation  
31 of caecaloids and their tissue of origin enables their use as an *in vitro* model to study host  
32 interactions with important caecal pathogens. Thus, exploiting this system we investigated  
33 the responses of caecal IECs to extracellular vesicles (EVs) secreted/excreted by the  
34 intracellular helminth *Trichuris muris*. Our findings reveal novel immunoregulatory effects  
35 of whipworm EVs on the caecal epithelium, including the downregulation of responses to  
36 nucleic acid recognition and type-I interferon (IFN) signalling.

37

38

39

40

41

42

43 **Keywords:** organoids, caecum, caecaloids, intestinal epithelial cells, *Trichuris muris*,  
44 extracellular vesicles, immunoregulation.

## 45 **1. INTRODUCTION**

46 The intestine is a continuous tube that stretches from the pylorus to the anus, lined  
47 internally by a monolayer of columnar epithelium (Mowat and Agace, 2014). Although  
48 continuous, the intestine is composed of defined segments with distinct macro- and  
49 microscopic appearances, and specialized functions (Mowat and Agace, 2014; Nguyen et  
50 al., 2015). These segments are the duodenum, jejunum and ileum of the small intestine,  
51 and caecum, proximal, transverse and distal colon, rectum and anus of the large intestine  
52 (Mowat and Agace, 2014; Nguyen et al., 2015).

53

54 The caecum is an intestinal appendage at the junction of the small intestine and the large  
55 intestine (Burns et al., 2004). This blind-ended sac harbours commensal bacteria that in  
56 humans can replenish gut microbiota after disturbances and in the mouse are involved in  
57 the fermentative digestion of plant polysaccharides that cannot be digested by enzymes of  
58 the small intestine (Al Alam et al., 2012; Backhed et al., 2005; Burns et al., 2004; Eckburg  
59 et al., 2005; Mowat and Agace, 2014; Nguyen et al., 2015). Microscopically, the caecum is  
60 different from the small intestine because it lacks villi and is more similar to the colon since  
61 its mucosa consists of crypts of Lieberkühn with only short regions of flat surface  
62 epithelium (Barker, 2014; Mowat and Agace, 2014). Like both the small intestine and colon  
63 linings, the caecal epithelium is generated by the division of long-lived intestinal stem cells  
64 (ISC) that reside near the bottom of the crypts and produce proliferating transit-amplifying  
65 (TA) progenitor cells that later differentiate giving rise to absorptive enterocytes and  
66 secretory cells (Paneth, goblet, enteroendocrine and tuft cells) (Barker, 2014). However,  
67 the cellular composition of the caecal epithelium is different to that of the small intestine  
68 because in the caecum, goblet cells are numerous and found throughout the crypts while  
69 Paneth cells are rare (Mowat and Agace, 2014). The colon epithelium presents even larger  
70 numbers of goblet cells when compared with the caecum but Paneth cells are absent

71 (Mowat and Agace, 2014; Nguyen et al., 2015). This differential cellular composition  
72 contributes to variations in the thickness of the mucus layers overlaying the epithelium and  
73 in the microbiota structure (James et al., 2020; McGuckin et al., 2011; Mowat and Agace,  
74 2014). These differences result in distinct niches that are colonised by enteric pathogens,  
75 which have successfully evolved to invade and persist in particular intestinal segments.

76

77 Understanding the embryonic development of the intestine and the signalling pathways  
78 that govern ISC proliferation and differentiation has enabled three-dimensional (3D)  
79 organoid cultures to be developed from small intestine and colon adult ISC (Date and  
80 Sato, 2015; Sato and Clevers, 2013; Sato et al., 2011; Sato et al., 2009). Organoids are  
81 capable of self-renewal and spatial organization, and exhibit similar cellular composition,  
82 tissue architecture and organ functionality as their tissue of origin (Date and Sato, 2015;  
83 Fatehullah et al., 2016; Li and Izpisua Belmonte, 2019). Culture conditions for enteroids  
84 recreate the stem cell niche (SCN), including an extracellular matrix support that mimics  
85 the basal membrane component, and a combination of growth factors and morphogens  
86 (R-spondin 1, epidermal growth factor (EGF) and Noggin) that stimulate or inhibit the  
87 signalling pathways regulating ISC proliferation and differentiation (Date and Sato, 2015;  
88 Sato and Clevers, 2013; Sato et al., 2009). A gradient of Wnt signalling, from Paneth cells,  
89 is required for the budding of crypt-like structures. The bottom of crypts contain stem and  
90 Paneth cells that push proliferating TA cells towards the lumen, where decreasing Wnt  
91 levels trigger terminal differentiation of the cells (Sato and Clevers, 2013). Wnt-producing  
92 Paneth cells are absent in the colon, so exogenous addition of Wnt ligand (Wnt3A) is  
93 required to maintain ISC division in colonoid cultures (Date and Sato, 2015; Sato and  
94 Clevers, 2013; Sato et al., 2011). However, the addition of Wnt3A to the medium causes  
95 the Wnt gradient to be lost and the organoids to become symmetric round cysts, consisting  
96 of a homogeneous population of stem and TA progenitor cells (Sato and Clevers, 2013;



97 Sato et al., 2011). Thus, differentiation of colon organoids into crypt-like structures  
98 containing the different epithelial cell lineages requires the withdrawal of Wnt3A (Sato and  
99 Clevers, 2013; Sato et al., 2011).

100

101 Caecal organoid cultures, hereafter named **caecaloids**, have been generated before  
102 using similar culture conditions to those used for colonoids and likewise grow as  
103 symmetric round cysts (Miyoshi and Stappenbeck, 2013; Zaborin et al., 2017). However,  
104 upon withdrawal of Wnt3A, caecaloids do not recreate the differentiated budding crypt-like  
105 structures (*Fig 1A*). Therefore, an alternative cocktail of growth factors/morphogens is  
106 needed to produce caecaloids that showcase the differentiated cells types and 3D spatial  
107 organisation present in the caecum.

108

109 The caecal epithelium is the primary colonization site and port of entry for many clinically  
110 important pathogens for which mouse models exist, including *Trichuris trichiura* (model  
111 organism *T. muris*), *Salmonella enterica*, serovar Typhymurium, *Campylobacter jejuni*,  
112 *Shigella sonnei*, *Escherichia coli* (ETEC, model organism *Citrobacter rodentium*), *Yersinia*  
113 *pseudotuberculosis* and *Entamoeba histolytica*, among others (Barthel et al., 2003; Collins  
114 et al., 2014; Fahlgren et al., 2014; Houghton et al., 2002; Klementowicz et al., 2012; Lee et al.,  
115 1986; Pongpech et al., 1989). Developing mouse caecaloid cultures will enable host  
116 interactions of these important pathogens to be studied in an *in vitro* model. Ensuring that  
117 these organoids recapitulate the tissue architecture and contain the different IEC types  
118 present in the caecum is pivotal to the success of this model system.

119

120 Here, we established culture conditions for the long-term expansion, differentiation and  
121 characterisation of caecaloid cultures from adult mouse caecal ISC. Caecaloids closely  
122 recapitulated the full complement of stem and differentiated cell types present in the

123 caecum, reproducing cellular composition differences between the caecal and small  
124 intestinal epithelium. To exemplify the use of caecaloids in the study of host-pathogen  
125 interactions in the caecum, we investigated the responses of caecaloids to EVs present in  
126 the excretory/secretory (ES) products of the mouse whipworm *T. muris*. EVs are lipid-  
127 enclosed structures that can deliver pathogen proteins and nucleic acids into host cells  
128 once internalised (Kuipers et al., 2018). *T. muris* EVs can confer protection to whipworm  
129 infection in mice (Shears et al., 2018a) and one study has shown *T. muris* EVs are  
130 internalised by cells within colonoids (Eichenberger et al., 2018b). Here we examined the  
131 functional effects of *T. muris* EVs in caecaloids, which most closely match the *in vivo*  
132 context in which the parasites naturally reside. Using RNA sequencing (RNA-seq) of  
133 caecaloids microinjected with EVs *T. muris* we discovered a novel immune regulatory  
134 function of whipworm EVs on the caecal epithelium, namely the downregulation of  
135 responses to nucleic acid recognition and type-I IFN signalling. Our work provides a key  
136 tool for future analyses of host interactions with caecal pathogens and their products and  
137 identifies new modulatory activities of helminth EVs on IECs.

## 138 2. MATERIALS AND METHODS

139

### 140 2.1 Enteroid and caecaloid culture

141 Enteroid and caecaloids lines from adult C57BL/6 mice (6-8 weeks old) were derived from  
142 small intestinal and caecal epithelial crypts. Briefly, tissues were cut open longitudinally  
143 and luminal contents removed. Tissues were then minced, segments were washed with  
144 ice cold Dulbecco's PBS1X without calcium and magnesium (PBS) (Gibco Thermo Fisher  
145 Scientific) and vigorous shaking to remove mucus, and treated with Gentle Cell  
146 Dissociation Reagent (STEMCELL Tech) for 15 at room temperature (RT) with continuous  
147 rocking. Released crypts were collected by centrifugation, washed with ice cold PBS,  
148 resuspended in 200  $\mu$ l of cold Matrigel<sup>TM</sup> (Corning), plated in 6-well tissue culture plates  
149 and overlaid with a Wnt rich medium containing *base growth medium* (Advanced  
150 DMEM/F12 with 2mM Glutamine, 10 mM HEPES, 1X penicillin/streptomycin (pen/strep),  
151 1X B27 supplement, 1X N2 supplement (all from Gibco Thermo Fisher Scientific)), 50%  
152 Wnt3A conditioned medium (Wnt3A cell line, kindly provided by the Clevers laboratory),  
153 10% R-spondin1 conditioned medium (293T-HA-Rspo1-Fc cell line, Trevigen), 1mM N-  
154 acetylcysteine (Sigma-Aldrich), 50 ng/ml rmEGF (Gibco Thermo Fisher Scientific), 100  
155 ng/ml rmNoggin (Peprotech), 10  $\mu$ M Rho kinase (ROCK) inhibitor (Y-27632)  
156 dihydrochloride monohydrate (Sigma-Aldrich), and exclusively for caecaloids, 100 ng/ml rh  
157 fibroblast growth factor (FGF)-10 (Peprotech). Organoids were cultured at 37°C, 5% CO<sub>2</sub>.  
158 The medium was changed every two days and after one week, pen/strep was take out  
159 from the medium and Wnt3A conditioned medium was completely removed for enteroids  
160 or reduced to 30% for caecaloids (*expansion medium*). Expanding enteroids and  
161 caecaloids were passaged, after recovering from Matrigel using ice-cold PBS or Cell  
162 Recovery Solution (Corning), by physical dissociation through vigorous pipetting with a  
163 p200 pipette every five to seven days.

164 For differentiation of caecaloids, after passaging, organoids were grown in *expansion*  
165 *medium* for at least two days to allow reformation and growth in size. Then, medium was  
166 changed to *differentiation medium* containing 10% Wnt3A conditioned medium which was  
167 replaced every two days for up to four days.

168

## 169 **2.2 Whole mount immunofluorescence staining of organoids**

170 For whole mount staining, differentiated organoids were recovered from Matrigel using ice-  
171 cold PBS, re-plated onto chamber slides (Millicell EZ SLIDE 8-well glass, Millipore) and  
172 cultured for additional two days with *differentiation medium*. On the day of staining,  
173 organoids were fixed with 4% Formaldehyde, Methanol-free (Thermo Fisher) in PBS for 1  
174 h at RT, washed three times with PBS and permeabilized with 2% Triton X-100 (Sigma-  
175 Aldrich) 5% Fetal Bovine Serum (FBS) (Gibco Thermo Fisher Scientific) in PBS for 2 h at  
176 RT. Organoids were then incubated with primary antibodies  $\alpha$ -villin (1:100, Abcam,  
177 ab130751),  $\alpha$ -Lysosyme (1:40, Dako, A0099),  $\alpha$ -Ki-67 (1:250, Abcam, ab16667),  $\alpha$ -  
178 Chromogranin A (1:50, Abcam, ab15160),  $\alpha$ -Dcamkl-1 (1:200, Abcam, ab31704) and the  
179 lectins *Ulex europaeus* agglutinin (UEA, 1:100, Sigma-Aldrich, 19337) and *Sambucus*  
180 *nigra* (SNA, 1:50, Vector Laboratories, FL-1301) diluted in 0,25% Triton X-100 5% FBS in  
181 PBS overnight at 15°C. After three washes with PBS, organoids were incubated with  
182 secondary antibody (Donkey anti-rabbit 555, 1:400, Molecular Probes, A31572) for 6 h at  
183 RT or overnight at 15°C. Organoids were washed three times with PBS and stained with  
184 DID (2 $\mu$ g/ml, Biotium, 60014) overnight at 15°C. After three washes with PBS, organoids  
185 were counterstained with 4',6'-diamidino-2-phenylindole (DAPI, 1:1000, Appllichem,  
186 A1001.0010) at RT for 1 h. Organoids were washed six times with PBS and incubated with  
187 FocusClear<sup>TM</sup> (CelExplorer Labs.) at RT for 1-2 h. Chamber slides were disassembled and  
188 mounted using ProLong Gold anti-fade reagent (Life Technologies Thermo Fisher  
189 Scientific) and coverslip. Confocal microscopy images were taken with a Leica SP8 and

190 LSM 510 Meta Zeiss confocal microscopes and processed using the Leica Application  
191 Suite X (LAS X) software.

192

### 193 **2.3 Transmission electron microscopy (TEM)**

194 Caecaloids were fixed in 2.5% glutaraldehyde/2% paraformaldehyde in 0.1M sodium  
195 cacodylate buffer, post-fixed with 1% osmium tetroxide and mordanted with 1% tannic acid  
196 followed by dehydration through an ethanol series (contrasting with uranyl acetate at the  
197 30% stage) and embedding with an Epoxy Resin Kit (all from Sigma-Aldrich). Ultrathin  
198 sections cut on a Leica UC6 ultramicrotome were contrasted with uranyl acetate and lead  
199 nitrate, and images recorded on a FEI 120 kV Spirit Biotwin microscope on an F416 Tietz  
200 CCD camera.

201

### 202 **2.4 Cell composition analysis of tissues and organoids using ImageStream**

203 Small intestines and caecums of mice were processed individually in parallel. Tissues  
204 were open longitudinally, washed with ice cold HBSS 1x (Gibco Thermo Fisher Scientific)  
205 containing 1x pen/strep to remove the luminal contents and cut in small fragments. These  
206 fragments were incubated at 37°C in DMEM High Glucose (Gibco Thermo Fisher  
207 Scientific), 20% FBS, 2% Luria Broth, 1x pen/strep, 100 µg/ml Gentamicin, 10 µM ROCK  
208 inhibitor and 0,5 mg/ml Dispase II (Sigma) with horizontal shaking for 90 min to detach  
209 epithelial crypts. The crypts containing supernatant were filtered through a 300 µm cell  
210 strainer (PluriSelect) and pelleted by centrifugation at 150 g for 5 min at RT. Crypts and  
211 enteroids/caecaloids were dissociated into single cells by TrypLE Express (Gibco Thermo  
212 Fisher Scientific) digestion 10-20 min at 37°C. The epithelial single-cell suspension was  
213 filtered through a 30 µm cell strainer (Sysmex), washed and counted. Cells were fixed with  
214 4% Formaldehyde, Methanol-free in PBS for 20 min at 4°C, washed three times with PBS  
215 1% FBS and permeabilized with 1x Perm/Wash solution (diluted from BD Perm/Wash

216 Buffer 5x in PBS) at RT for 15 min. Cells were then incubated with the primary antibodies  
217 used for immunofluorescence staining diluted in 1x Perm/Wash solution for 30 min at 4°C.  
218 Cells were washed three times with 1x Perm/Wash solution and stained with secondary  
219 antibody/lectins and DAPI diluted in 1x Perm/Wash solution for 30 min at 4°C. After  
220 washes with 1x Perm/Wash solution and PBS, cells were resuspended in PBS. Samples  
221 were acquired on an Amnis ImageStream MkII Imaging Flow Cytometer (Luminex) at a low  
222 speed/high sensitivity flow rate and object magnification at 60x using the INSPIRE  
223 software. Data were analysed using the Image Data Exploration and Analysis Software  
224 (IDEAS) software. Gating strategy is shown in *Supplementary Figure 3*.

225

## 226 **2.5 RNA extraction and Quantitative Real-Time PCR (qRT-PCR)**

227 Caecaloids were recovered from Matrigel using Cell Recovery Solution and washed with  
228 ice-cold PBS. Caecaloids were then lysed with RTL buffer (RNeasy Mini-kit, QUIAGEN)  
229 plus beta-mercaptoethanol (Sigma-Aldrich) and RNA was extracted following manufacturer  
230 instructions. Gene expression was quantified by qRT-PCR using ABsolute QPCR Mix,  
231 ROX and TaqMan primers (all from Thermo Fisher Scientific) for *Lgr5* (Mm00438890\_m1),  
232 *Alpi* (Mm01285814\_g1), *Muc2* (Mm01276696\_m1), *Lyz1* (Mm00657323\_m1), *Chga*  
233 (Mm00514341\_m1) and *Gapdh* (Mm99999915\_g1) in a StepOne Real Time PCR system  
234 (Applied Biosystems).

235

## 236 **2.6 *T. muris* EV purification and quality control.**

237 *T. muris* EVs were purified from the ES of *T. muris* as previously described (Shears et al.,  
238 2018a). Briefly, the adult parasites were cultured in RPMI medium supplemented with 500  
239 U/ml penicillin and 500 µg/ml streptomycin (Sigma Aldrich) for 18 h (after removing the  
240 first 4 hours of ES). The ES was spun at 720 g for 15 min to remove eggs and the  
241 supernatant was then filtered using a 0.22 µm filter (Millipore) to further remove debris.

242 Supernatants were then ultracentrifuged at 100,000 g for 2 h in polyallomer tubes using an  
243 SV323 rotor. The ultracentrifuge pellet was washed with PBS and re-pelleted by a  
244 subsequent spin at 100,000 g for 2 h. The EV pellet was resuspended in 2 ml PBS and  
245 stored at -80 prior to further concentration using a 5 kDa MW cut-off vivaspin (Sartorius).  
246 The protein content of EVs was quantified using Qubit (Invitrogen) and concentration of  
247 EVs quantified by Nanosight (Malvern), resulting in a measurement of 0.18  $\mu\text{g}/\mu\text{l}$  and  
248  $2.1 \times 10^7/\mu\text{l}$  EVs. EVs were diluted 2:3 with phenol red (Sigma Aldrich) (final concentration  
249 of 0.12  $\mu\text{g}/\mu\text{l}$ ) prior microinjection into the organoids.

250

### 251 **2.7 Microinjection of caecaloids**

252 For microinjection, differentiated caecaloids were recovered from Matrigel using ice-cold  
253 PBS, re-plated onto microinjection plates (MatTek Corporation) and cultured for additional  
254 two days with *differentiation medium*. Microinjections were performed using the Eppendorf  
255 TransferMan NK2-FemtoJet express system, in an environmental chamber integrated to a  
256 Zeiss Axiovert 200M bright field microscope, to allow all injections to be carried out at  
257 37°C and 5% CO<sub>2</sub>. For RNA sequencing (RNA-seq), 50 caecaloids per microinjection plate  
258 were injected with either PBS (as control) or EVs diluted with phenol red so that injected  
259 caecaloids could be easily identified. After injection, caecaloids were incubated for 24 h at  
260 37°C, 5% CO<sub>2</sub>, recovered using Cell Recovery Solution and total RNA was extracted as  
261 described above.

262

### 263 **2.8 RNA-seq and analysis**

264 RNA-seq was performed in organoids microinjected with PBS or *T. muris* EVs (n=3) in  
265 technical triplicates. Multiplexed cDNA libraries were generated from high-quality RNA  
266 samples (RNA integrity number  $\geq 7.0$ ) according to the Illumina TruSeq RNA Preparation  
267 protocol, and sequenced on an Illumina HiSeq platform. We obtained 3.9 to 4.5 million

268 paired end reads per sample; raw data have been submitted to ENA under the following  
269 accessions: ERS2914946, ERS2914953, ERS2914962, ERS2914970, ERS2914978,  
270 ERS2914986. Kallisto (v0.43.1)(Bray et al., 2016) was used to pseudoalign reads to the  
271 mouse GRCm38 transcriptome (downloaded from Ensembl release 97(Yates et al., 2020),  
272 <https://www.ensembl.org>), with over 92% of reads per sample pseudoaligning. For  
273 differential expression analysis, the DESeq function from the DESeq2 package  
274 (v1.24.0)(Love et al., 2014) was used to fit a negative binomial GLM for each gene and  
275 estimate log2 fold changes, and p values calculated with a Wald test. Genes with an  
276 adjusted p value < 0.05 are reported as being differentially expressed. Innate DB  
277 v5.4(Breuer et al., 2013) (<https://www.innatedb.com>) was used to identify enriched Gene  
278 Ontology terms. The variance stabilizing transformation function was used to transform  
279 counts for Principal Component Analysis (PCA) and heat map plotting. For inclusion in the  
280 heatmap, genes were selected based on an association with viral response related GO  
281 terms (GO:0051607, GO:0009615, GO:0098586, GO:0039536) by Innate DB and/or  
282 Ensembl and an absolute log2fold change > 1.



## 283 **3. RESULTS**

284

### 285 **3.1 Establishment of 3D caecaloid culture conditions**

286 The caecum, like other parts of the intestine, is composed of two layers: 1) an internal  
287 endoderm-derived columnar epithelium with absorptive and secretory functions and; 2) an  
288 external surrounding mesoderm-derived mesenchyme (Al Alam et al., 2012; Burns et al.,  
289 2004). The mouse caecum develops as a bud propagating off the main gut tube early in  
290 the differentiation of the gastrointestinal tract (from day 10.5 of embryonic development)  
291 (Burns et al., 2004). Epithelial-mesenchymal interactions are critical for the formation of  
292 gastrointestinal buds such as the caecum and the stomach. In particular, FGF-10,  
293 expressed specifically in the mesenchyme of the caecal bud, signals via the FGF receptor  
294 2b of the epithelium to promote epithelial proliferation at the caecal bud during days 10.5–  
295 14.5 of embryonic development (Al Alam et al., 2012; Burns et al., 2004; Zhang et al.,  
296 2006). Stomach organoid cultures require FGF-10, in addition to the mouse colonoid  
297 culture conditions, to drive budding events and expansion of the cultures (Barker et al.,  
298 2010). With this in mind and considering the presence of small numbers of Paneth cells in  
299 the caecum (Mowat and Agace, 2014; Nguyen et al., 2015) that contribute Wnt to the  
300 culture, we modified existing protocols for colonoid generation (Sato et al., 2011), by  
301 adjusting the concentration of Wnt3A in culture medium and including FGF-10.

302 Upon isolation, crypts were cultured in 50% Wnt3A-conditioned medium until organoids  
303 were formed, presenting a cystic morphology (*Fig 1A*). After the first passage, Wnt3A-  
304 conditioned medium concentration was reduced to 30% for long-term maintenance culture.  
305 At this concentration and in the presence of FGF-10, caecaloids grew as a mixture of  
306 cystic and budding organoids and were easily committed to full differentiation by reduction  
307 of Wnt3A-conditioned medium concentration to 10% (*Fig 1B and C*). FGF-10 was critical to  
308 drive budding events on caecaloids (*Fig 1C*), just as in stomach organoids (Barker et al.,

309 2010). In the absence of Wnt3A (enteroid culture condition) caecaloids did not survive,  
310 indicating the requirement of Wnt3A addition to the medium for their expansion (data not  
311 shown). However, when long-term culturing caecaloids with 50% Wnt3A-conditioned  
312 medium, as required for the culture of colonoids, it was not possible to induce their  
313 differentiation by withdrawal of Wnt3A (*Fig 1A*). These results indicate caecal ISC have  
314 specific growth factor requirements for division and differentiation, which are modelled *in*  
315 *vitro* by fine-tuning the addition of exogenous Wnt ligands and mimicking epithelial-  
316 mesenchymal interactions by addition of FGF-10.

317

### 318 **3.2 Differentiated caecaloids closely recapitulate the caecal epithelium**

319 While budding morphology is a sign of differentiation of organoids, we next sought to  
320 evaluate if differentiation culture conditions (initial culture after passaging in expansion  
321 medium with 30% Wnt3A-conditioned medium for 2 days, followed by 4 days culture in  
322 differentiation medium with 10% Wnt3A-conditioned medium) resulted in full epithelial  
323 maturation of caecaloids recreating the caecal epithelium. Therefore, to characterise the  
324 caecaloid cellular composition, we first used qRT-PCR to evaluate the expression of  
325 known IEC populations markers, including Leucine-rich repeat-containing G-protein  
326 coupled receptor 5 (*Lgr5*) for stem cells, alkaline phosphatase (*Alpi*) for absorptive  
327 enterocytes, mucin 2 (*Muc2*) for goblet cells, lysozyme 1 (*Lyz1*) for Paneth cells and  
328 chromogranin A (*ChgA*) for enteroendocrine cells (*Fig 1D*). Gene expression was  
329 measured in caecaloids maintained with 50% or 30% Wnt3A-conditioned medium and in  
330 differentiated caecaloids cultured as described above. All markers were detected  
331 confirming the presence of all cellular populations. When comparing caecaloids grown in  
332 the presence of 50% and 30% Wnt3A-conditioned medium, we observed a downregulation  
333 of *Lgr5* in the latter group indicating a reduction in the number of stem cells (*Fig 1D*).  
334 Conversely, growing organoids under expansion conditions (30% Wnt3A) induced the

335 expression of *Muc2* and *Lyz1*, suggesting an increase in goblet and Paneth cells,  
336 respectively (*Fig 1D*). Upon differentiation of caecaloids by decreasing Wnt3A-conditioned  
337 medium concentration to 10%, we observed further downregulation of *Lgr5* and detected  
338 upregulation of *Alpi* indicating an increase in absorptive enterocytes (*Fig 1D*). These  
339 results agree support our morphological observations (*Fig 1B*) of further differentiation of  
340 organoids upon reduction of the concentration of Wnt3A in the culture medium (*Fig 1B*).

341

342 To further study the differentiation status of the caecaloids we performed confocal  
343 immunofluorescence microscopy of caecaloids and enteroids (*Figs 2 and 3*). The cellular  
344 markers analysed were Ki-67 (present in proliferating stem and TA cells), villin (staining  
345 microvilli on absorptive enterocytes), chromogranin A (marker of enteroendocrine cells),  
346 lysozyme (produced by Paneth cells), Dclk-1 (identifying tuft cells), and a combination of  
347 the lectins UEA and SNA that bind mucus on goblet cells. We observed that differentiated  
348 caecaloids contained the following: proliferating cells (Ki-67<sup>+</sup>) at the bottom of budding  
349 regions (*Fig 2A*), microvilli of enterocytes bordering the lumen (*Fig 2B*), few  
350 enteroendocrine (*Fig 2C*) and tuft cells (*Fig 2D*) but numerous goblet cells (*Fig 2A-D*). The  
351 presence of enterocytes, goblet and enteroendocrine cells in caecaloids was confirmed  
352 using TEM (*Fig 2E*). We did not detect Paneth cells in caecaloids using this methodology  
353 (*Supplementary Fig 1*). In contrast, enteroids have numerous Paneth cells (*Fig 3E*) present  
354 at the bottom of budding regions where Ki-67<sup>+</sup> cells are also located. Enteroids have fewer  
355 goblets cells (*Fig 3A-E*), and show similar levels of enteroendocrine (*Fig 3C*) and tuft cells  
356 (*Fig 3D*) when compared with caecaloids (*Fig 2*).

357

358 Next, we aimed to determine how caecaloids and enteroids reflect the cellular composition  
359 of the tissue of origin. Thus, to quantitatively characterise the different cellular populations  
360 in tissue and organoids, we performed ImageStream analysis on single cell preparations

361 stained with antibodies and lectins for markers of the major IECs populations.  
362 ImageStream combines both bright field and fluorescence microscopy, coupled with flow  
363 cytometry capabilities, allowing enterocytes as well as stem, enteroendocrine, Paneth and  
364 goblet cells to be clearly identified and quantified (*Fig 4A* and *Supplementary Fig 2*). We  
365 found a remarkable similarity in the percentages of the different cell types in the organoids  
366 and the tissue from which they were derived (*Fig 4B*). Moreover, these results confirmed  
367 our observations using confocal immunofluorescence staining that showed proportionally  
368 more goblet cells in the caecal tissue and caecaloids than in the small intestine and in  
369 enteroids (*Fig 4B*). Conversely, the proportions of Paneth cells are lower in the caecum  
370 and caecaloids when compared with small intestine and enteroids (*Fig 4B*). The  
371 proportions of enterocytes, enteroendocrine and stem cells are similar among both  
372 tissues and organoids (*Fig 4B*). Together these data demonstrate that our methods allow  
373 the generation of caecaloids closely recapitulating the cellular composition and  
374 architecture of the caecal epithelium.

375

### 376 **3.3 Caecaloids as a model to study host-pathogen interactions: understanding the** 377 **effects of *T. muris* EVs on caecal IECs**

378 Next, we aimed to use caecaloids as an *in vitro* model to study interactions between  
379 pathogens invading the caecum and the epithelium of this organ. Whipworms are  
380 intracellular helminths that inhabit the caecal epithelium. In order to persist in their host,  
381 whipworms modulate intestinal inflammation ensuring their host and their own survival  
382 (Grencis, 2015; Klementowicz et al., 2012). One such mechanism of immunomodulation is  
383 the release of ES products that can interact with immune cells, the regulatory impact of  
384 which has been described (Bancroft et al., 2019; Klaver et al., 2013; Kuijk et al., 2012;  
385 Laan et al., 2017; Leroux et al., 2018; Shears et al., 2018b). ES products likely act also on  
386 caecal IECs given whipworms live inside the epithelium; however, little is known about

387 these interactions (Hiemstra et al., 2014). One component of whipworm ES are EVs, lipid  
388 membrane enclosed structures with the capacity to transfer a multitude of nucleic acids  
389 and proteins to a single cell at once, and that have been shown to be potent host  
390 modulators (Buck et al., 2014; Coakley et al., 2017; Eichenberger et al., 2018a;  
391 Eichenberger et al., 2018b; Hansen et al., 2015; Shears et al., 2018a; Tritten et al., 2017).  
392 To date, the responses of caecal IECs to whipworm EVs have not been studied. To  
393 investigate these interactions, we purified EVs from the ES of *T. muris* adult worms  
394 (*Supplementary Fig 2*) and microinjected the EVs into caecaloids. As the apical surface of  
395 the IECs in 3D caecaloids is facing the lumen (*see microvilli (villin) staining Fig 2B*),  
396 microinjection is therefore required to mimic the interactions that naturally take place in the  
397 caecum (Duque-Correa et al., 2020). PBS was microinjected in 3D caecaloids as a control.  
398 After 24 h of culture, total RNA was extracted and gene expression changes in response  
399 to EV administration were evaluated by RNA-seq. We observed a clear response of the  
400 caecaloids to the EVs (*Fig 5A and B*) with a total of 88 genes upregulated and 173 genes  
401 downregulated. Interestingly, stimulation with EVs secreted by adult *T. muris* parasites  
402 resulted in significantly reduced expression of viral response associated genes by caecal  
403 IECs (*Fig 5C*). Specifically, we detected decreased expression of genes involved in the  
404 cytosolic sensing of nucleic acids including *Dhx58*, *Ddx60* and *Irf7*, which are part of the  
405 signalling cascade that results upon engagement of retinoic-acid inducible gene I (RIG-I)-  
406 like receptors by dsRNA (Liu et al., 2016). Consequently, EVs treatment of caecaloids  
407 resulted in downregulation of interferon stimulated genes (ISGs), comprising *Oas12*, *Oas2*  
408 and 3, *Ifit1* and 3, and *Isg15*, which are transcribed in response to nucleic acid recognition  
409 and type-I IFN signalling (Perng and Lenschow, 2018). Although this is just one example  
410 of the downstream use of caecaloids, our results suggest the anti-inflammatory effects of  
411 whipworm infections and their ES products can be, at least in part, mediated by a direct  
412 effect on the caecal epithelium.

#### 413 4. DISCUSSION

414 Here we developed culture conditions for the long-term maintenance and differentiation of  
415 caecaloids closely resembling the composition and spatial conformation of the caecal  
416 epithelium. Our methods fill a crucial gap on the protocols to generate organoids  
417 recreating the differences on the epithelium that distinguish all intestinal segments and  
418 that are crucial in the use of these *in vitro* systems to model host-enteric pathogen  
419 interactions.

420 Several pathogens have a tropism for the caecum and the particularities of its mucosa  
421 provide a defined niche for which these bacteria and parasites have evolved mechanisms  
422 to invade and colonise. In particular, whipworms are large metazoan parasites that live in  
423 the caecum of their host, where they tunnel inside IECs creating a multi-intracellular niche  
424 (Klementowicz et al., 2012; Tilney et al., 2005). Whipworms can remain in their host for  
425 years causing chronic infections. To optimise their residence in their hosts, whipworms  
426 manipulate host inflammation partly through the immunoregulatory effects of ES products  
427 released by the parasites (Bancroft et al., 2019; Eichenberger et al., 2018b; Hansen et al.,  
428 2015; Klaver et al., 2013; Kuijk et al., 2012; Laan et al., 2017; Leroux et al., 2018; Shears  
429 et al., 2018a; Shears et al., 2018b; Tritten et al., 2017). Progress has been made to  
430 understand the composition and anti-inflammatory actions of whipworm ES products. This  
431 has largely involved proteomic analyses of the ES products and, more recently,  
432 characterisation of the protein and nucleic acid cargo of EVs (Eichenberger et al., 2018b;  
433 Hansen et al., 2015; Leroux et al., 2018; Shears et al., 2018a; Shears et al., 2018b; Tritten  
434 et al., 2017; White, 2020). Moreover, immunomodulatory effects of adult *T. suis* (natural  
435 pig whipworm) and *T. muris* ES products on different immune cells have been described  
436 (Bancroft et al., 2019; Klaver et al., 2013; Kuijk et al., 2012; Laan et al., 2017; Leroux et  
437 al., 2018). In contrast, very little is understood regarding the modulatory functions of ES  
438 products, or EVs in particular, on IECs, with only one report showing that *T. suis* ES

439 stimulation of an epithelial cell line results in reduced barrier function and decreased  
440 lipopolysaccharide-induced TNF- $\alpha$  and CXCL1 production (Hiemstra et al., 2014). IECs  
441 are important sensors of intestinal helminth infections initiating innate immune responses  
442 and with specialised effector functions that contribute to the expulsion (Artis and Grencis,  
443 2008; Grencis, 2015). Compared to cell lines, organoids more accurately reproduce the  
444 composition and architecture of the intestinal epithelium and recently have started to be  
445 used to characterise the interactions and IECs responses to ES products of various  
446 helminths (Duque-Correa et al., 2019). Specifically, stimulation of murine enteroids with  
447 *Trichinella spiralis* ES products and extracts indicated that sensing of parasitic products by  
448 tuft-cell receptors results in Ca<sup>2+</sup> responses (Luo et al., 2019). Moreover, imaging  
449 experiments of murine enteroids and colonoids microinjected with EVs present in the ES of  
450 *Nippostrongylus brasiliensis* and *T. muris*, respectively, showed their uptake by host IECs  
451 (Eichenberger et al., 2018a; Eichenberger et al., 2018b). A similar approach has been  
452 used to visualize the internalization of *Ascaris suum* EVs co-cultured with canine enteroids  
453 (Chandra et al., 2019). However, to date organoids have not been exploited to study host  
454 IECs responses to helminth EVs.

455 Here, for the first time, we evaluated the functional effects of helminth EVs on IECs using  
456 organoids. Microinjection of adult *T. muris* EVs in fully differentiated caecaloids resulted in  
457 downregulation of expression of viral response associated genes by caecal IECs,  
458 including those involved in cytosolic sensing of nucleic acids via RIG-I-like receptors and  
459 ISGs produced in response to nucleic acid recognition and type-I IFN signalling (Liu et al.,  
460 2016; Perng and Lenschow, 2018). Intriguingly, *T. muris* EVs contain parasite small RNAs  
461 (sRNAs) (Eichenberger et al., 2018b; Tritten et al., 2017; White, 2020), which instead of  
462 triggering host responses to foreign RNA appear to suppress such detection mechanisms.  
463 This may enable EVs functions, allowing foreign RNA cargo to operate without being  
464 sensed by cell. Recent publications have shown type-I IFN responses are induced in



465 response to helminth infections. Particularly, stimulation with *Schistosoma mansoni*  
466 antigens (Webb et al., 2017) and infection with *N. brasiliensis* (Connor et al., 2017) results  
467 in type-I IFN signalling in dendritic cells, which is required for initiation of Th2 responses. In  
468 the setting of *Heligmosomoides polygyrus* infection, type-I IFN responses are reported to  
469 be upregulated in the duodenum (McFarlane et al., 2017) and inhibit granuloma formation  
470 around larval parasites (Reynolds et al., 2014). Interestingly, type-I IFN responses have  
471 not been previously associated to whipworm infections, but their relevance on the  
472 development of type 2 immunity in other helminths suggest that by blocking them adult  
473 whipworms may counteract host immune responses that result in their expulsion. Our  
474 findings open therefore a new avenue of investigation on the interactions of the worm with  
475 its host cells and the role of IECs as sensors and orchestrators of the immune responses  
476 against whipworms (Artis and Grencis, 2008). In the near future, we aim to understand the  
477 mechanisms by which the nucleic acids and protein cargo of the EVs exert such functions  
478 in caecaloids. In this regard, our studies on the sRNAs composition of *T. muris* EVs  
479 presented on this special issue (White, 2020) will be critical in the identification of targets  
480 in the host IECs. Moreover, our methods for microscopy characterisation of IECs  
481 populations in caecaloids will be pivotal to pinpoint IEC types preferentially internalising  
482 EVs and their intracellular interactions. These future experiments will also shed light into  
483 the immunoregulatory effects of therapies using live parasitic worms including whipworms  
484 (*T. trichiura* and *T. suis*), worm secretions and worm-derived synthetic molecules that are  
485 being trialled to treat Intestinal Bowel Diseases (IBD) (Smallwood et al., 2017; Varyani et  
486 al., 2017).

487 The remarkable recapitulation of the caecal epithelium achieved by caecaloids will  
488 similarly allow the interactions of other caecal pathogens and commensals with the IECs of  
489 this organ to be studied with precision. In particular, the multicellularity of this *in vitro*  
490 system can be exploited to investigate the role of different IECs populations in pathogen



491 invasion and colonization, host damage and responses (Duque-Correa et al., 2019). The  
492 up- and down-regulation of cell populations and factors in caecal-specific context can also  
493 be evaluated after exposure to pathogens and their products (Duque-Correa et al., 2019).  
494 In addition, caecaloids can be used in studies investigating how caecal microbiota impact  
495 the caecal epithelium composition and metabolism. Moreover, caecaloids could be used to  
496 model inflammatory pathologies of the caecum, including cancer and IBD, and better  
497 understand their aetiology and compare it with inflammation present in other intestinal  
498 segments.

499 In the future, complementation of caecaloid cultures with other tissue components  
500 including cellular populations of the SCN (stromal and immune cells), commensal  
501 microbiota, chemical gradients and physical/mechanical forces (Barrila et al., 2018;  
502 Duque-Correa et al., 2019; Fatehullah et al., 2016; Takebe and Wells, 2019) will more  
503 closely recreate the caecal native microenvironment and provide a more complex model to  
504 investigate caecal pathologies and the intricacies of pathogen mechanisms to colonise  
505 and modulate these niches.

506 **ACKNOWLEDGEMENTS**

507 This work was supported by the National Centre for the Replacement, Refinement and  
508 Reduction of Animals in Research (UK) David Sainsbury Fellowship Grant NC/P001521/1;  
509 the Rosetrees Trust (UK) Grant M813; the Wellcome Trust (UK) Grants Z10661/Z/18/Z/WT  
510 and Z03128/Z/16/Z/WT; and The Royal Society (UK) Grant IC160132.

## 511 REFERENCES

512

513 Al Alam, D., Sala, F.G., Baptista, S., Galzote, R., Danopoulos, S., Tiozzo, C., Gage, P.,  
514 Grikscheit, T., Warburton, D., Frey, M.R., Bellusci, S., 2012. FGF9-Pitx2-FGF10 signaling  
515 controls cecal formation in mice. *Dev Biol* 369, 340-348.

516 Artis, D., Grencis, R.K., 2008. The intestinal epithelium: sensors to effectors in nematode  
517 infection. *Mucosal immunology* 1, 252-264.

518 Backhed, F., Ley, R.E., Sonnenburg, J.L., Peterson, D.A., Gordon, J.I., 2005. Host-  
519 bacterial mutualism in the human intestine. *Science* 307, 1915-1920.

520 Bancroft, A.J., Levy, C.W., Jowitt, T.A., Hayes, K.S., Thompson, S., McKenzie, E.A., Ball,  
521 M.D., Dubaissi, E., France, A.P., Bellina, B., Sharpe, C., Mironov, A., Brown, S.L., Cook,  
522 P.C., A, S.M., Thornton, D.J., Grencis, R.K., 2019. The major secreted protein of the  
523 whipworm parasite tethers to matrix and inhibits interleukin-13 function. *Nat Commun* 10,  
524 2344.

525 Barker, N., 2014. Adult intestinal stem cells: critical drivers of epithelial homeostasis and  
526 regeneration. *Nat Rev Mol Cell Biol* 15, 19-33.

527 Barker, N., Huch, M., Kujala, P., van de Wetering, M., Snippert, H.J., van Es, J.H., Sato,  
528 T., Stange, D.E., Begthel, H., van den Born, M., Danenberg, E., van den Brink, S.,  
529 Korving, J., Abo, A., Peters, P.J., Wright, N., Poulsom, R., Clevers, H., 2010. Lgr5(+ve)  
530 stem cells drive self-renewal in the stomach and build long-lived gastric units in vitro. *Cell*  
531 *Stem Cell* 6, 25-36.

532 Barrila, J., Crabbe, A., Yang, J., Franco, K., Nydam, S.D., Forsyth, R.J., Davis, R.R.,  
533 Gangaraju, S., Ott, C.M., Coyne, C.B., Bissell, M.J., Nickerson, C.A., 2018. Modeling Host-  
534 Pathogen Interactions in the Context of the Microenvironment: Three-Dimensional Cell  
535 Culture Comes of Age. *Infect Immun* 86.

536 Barthel, M., Hapfelmeier, S., Quintanilla-Martinez, L., Kremer, M., Rohde, M., Hogardt, M.,  
537 Pfeffer, K., Russmann, H., Hardt, W.D., 2003. Pretreatment of mice with streptomycin  
538 provides a *Salmonella enterica* serovar Typhimurium colitis model that allows analysis of  
539 both pathogen and host. *Infect Immun* 71, 2839-2858.

540 Bray, N.L., Pimentel, H., Melsted, P., Pachter, L., 2016. Near-optimal probabilistic RNA-  
541 seq quantification. *Nat Biotechnol* 34, 525-527.

542 Breuer, K., Foroushani, A.K., Laird, M.R., Chen, C., Sribnaia, A., Lo, R., Winsor, G.L.,  
543 Hancock, R.E., Brinkman, F.S., Lynn, D.J., 2013. InnateDB: systems biology of innate  
544 immunity and beyond--recent updates and continuing curation. *Nucleic acids research* 41,  
545 D1228-1233.

- 546 Buck, A.H., Coakley, G., Simbari, F., McSorley, H.J., Quintana, J.F., Le Bihan, T., Kumar,  
547 S., Abreu-Goodger, C., Lear, M., Harcus, Y., Ceroni, A., Babayan, S.A., Blaxter, M., Ivens,  
548 A., Maizels, R.M., 2014. Exosomes secreted by nematode parasites transfer small RNAs  
549 to mammalian cells and modulate innate immunity. *Nat Commun* 5, 5488.
- 550 Burns, R.C., Fairbanks, T.J., Sala, F., De Langhe, S., Mailleux, A., Thiery, J.P., Dickson,  
551 C., Itoh, N., Warburton, D., Anderson, K.D., Bellusci, S., 2004. Requirement for fibroblast  
552 growth factor 10 or fibroblast growth factor receptor 2-IIIb signaling for cecal development  
553 in mouse. *Dev Biol* 265, 61-74.
- 554 Chandra, L., Borchering, D.C., Kingsbury, D., Atherly, T., Ambrosini, Y.M., Bourgois-  
555 Mochel, A., Yuan, W., Kimber, M., Qi, Y., Wang, Q., Wannemuehler, M., Ellinwood, N.M.,  
556 Snella, E., Martin, M., Skala, M., Meyerholz, D., Estes, M., Fernandez-Zapico, M.E.,  
557 Jergens, A.E., Mochel, J.P., Allenspach, K., 2019. Derivation of adult canine intestinal  
558 organoids for translational research in gastroenterology. *BMC Biol* 17, 33.
- 559 Coakley, G., McCaskill, J.L., Borger, J.G., Simbari, F., Robertson, E., Millar, M., Harcus,  
560 Y., McSorley, H.J., Maizels, R.M., Buck, A.H., 2017. Extracellular Vesicles from a Helminth  
561 Parasite Suppress Macrophage Activation and Constitute an Effective Vaccine for  
562 Protective Immunity. *Cell Rep* 19, 1545-1557.
- 563 Collins, J.W., Keeney, K.M., Crepin, V.F., Rathinam, V.A., Fitzgerald, K.A., Finlay, B.B.,  
564 Frankel, G., 2014. *Citrobacter rodentium*: infection, inflammation and the microbiota. *Nat*  
565 *Rev Microbiol* 12, 612-623.
- 566 Connor, L.M., Tang, S.C., Cognard, E., Ochiai, S., Hilligan, K.L., Old, S.I., Pellefigues, C.,  
567 White, R.F., Patel, D., Smith, A.A., Eccles, D.A., Lamiable, O., McConnell, M.J.,  
568 Ronchese, F., 2017. Th2 responses are primed by skin dendritic cells with distinct  
569 transcriptional profiles. *J Exp Med* 214, 125-142.
- 570 Date, S., Sato, T., 2015. Mini-gut organoids: reconstitution of the stem cell niche. *Annu*  
571 *Rev Cell Dev Biol* 31, 269-289.
- 572 Duque-Correa, M.A., Maizels, R.M., Grecis, R.K., Berriman, M., 2019. Organoids - New  
573 Models for Host-Helminth Interactions. *Trends Parasitol.*
- 574 Duque-Correa, M.A., Maizels, R.M., Grecis, R.K., Berriman, M., 2020. Organoids - New  
575 Models for Host-Helminth Interactions. *Trends Parasitol* 36, 170-181.
- 576 Eckburg, P.B., Bik, E.M., Bernstein, C.N., Purdom, E., Dethlefsen, L., Sargent, M., Gill,  
577 S.R., Nelson, K.E., Relman, D.A., 2005. Diversity of the human intestinal microbial flora.  
578 *Science* 308, 1635-1638.
- 579 Eichenberger, R.M., Ryan, S., Jones, L., Buitrago, G., Polster, R., Montes de Oca, M.,  
580 Zuvelek, J., Giacomini, P.R., Dent, L.A., Engwerda, C.R., Field, M.A., Sotillo, J., Loukas,

- 581 A., 2018a. Hookworm Secreted Extracellular Vesicles Interact With Host Cells and Prevent  
582 Inducible Colitis in Mice. *Front Immunol* 9, 850.
- 583 Eichenberger, R.M., Talukder, M.H., Field, M.A., Wangchuk, P., Giacomini, P., Loukas, A.,  
584 Sotillo, J., 2018b. Characterization of *Trichuris muris* secreted proteins and extracellular  
585 vesicles provides new insights into host-parasite communication. *J Extracell Vesicles* 7,  
586 1428004.
- 587 Fahlgren, A., Avican, K., Westermarck, L., Nordfelth, R., Fallman, M., 2014. Colonization of  
588 cecum is important for development of persistent infection by *Yersinia pseudotuberculosis*.  
589 *Infect Immun* 82, 3471-3482.
- 590 Fatehullah, A., Tan, S.H., Barker, N., 2016. Organoids as an in vitro model of human  
591 development and disease. *Nat Cell Biol* 18, 246-254.
- 592 Grencis, R.K., 2015. Immunity to helminths: resistance, regulation, and susceptibility to  
593 gastrointestinal nematodes. *Annu Rev Immunol* 33, 201-225.
- 594 Hansen, E.P., Kringel, H., Williams, A.R., Nejsum, P., 2015. Secretion of RNA-Containing  
595 Extracellular Vesicles by the Porcine Whipworm, *Trichuris suis*. *J Parasitol* 101, 336-340.
- 596 Hiemstra, I.H., Klaver, E.J., Vrijland, K., Kringel, H., Andreasen, A., Bouma, G., Kraal, G.,  
597 van Die, I., den Haan, J.M., 2014. Excreted/secreted *Trichuris suis* products reduce barrier  
598 function and suppress inflammatory cytokine production of intestinal epithelial cells. *Mol*  
599 *Immunol* 60, 1-7.
- 600 Houpt, E.R., Glembocki, D.J., Obrig, T.G., Moskaluk, C.A., Lockhart, L.A., Wright, R.L.,  
601 Seaner, R.M., Keepers, T.R., Wilkins, T.D., Petri, W.A., Jr., 2002. The mouse model of  
602 amebic colitis reveals mouse strain susceptibility to infection and exacerbation of disease  
603 by CD4+ T cells. *J Immunol* 169, 4496-4503.
- 604 James, K.R., Gomes, T., Elmentaite, R., Kumar, N., Gulliver, E.L., King, H.W., Stares,  
605 M.D., Bareham, B.R., Ferdinand, J.R., Petrova, V.N., Polanski, K., Forster, S.C., Jarvis,  
606 L.B., Suchanek, O., Howlett, S., James, L.K., Jones, J.L., Meyer, K.B., Clatworthy, M.R.,  
607 Saeb-Parsy, K., Lawley, T.D., Teichmann, S.A., 2020. Distinct microbial and immune  
608 niches of the human colon. *Nat Immunol* 21, 343-353.
- 609 Klaver, E.J., Kuijk, L.M., Laan, L.C., Kringel, H., van Vliet, S.J., Bouma, G., Cummings,  
610 R.D., Kraal, G., van Die, I., 2013. *Trichuris suis*-induced modulation of human dendritic cell  
611 function is glycan-mediated. *Int J Parasitol* 43, 191-200.
- 612 Klementowicz, J.E., Travis, M.A., Grencis, R.K., 2012. *Trichuris muris*: a model of  
613 gastrointestinal parasite infection. *Seminars in immunopathology* 34, 815-828.

- 614 Kuijk, L.M., Klaver, E.J., Kooij, G., van der Pol, S.M., Heijnen, P., Bruijns, S.C., Kringel, H.,  
615 Pinelli, E., Kraal, G., de Vries, H.E., Dijkstra, C.D., Bouma, G., van Die, I., 2012. Soluble  
616 helminth products suppress clinical signs in murine experimental autoimmune  
617 encephalomyelitis and differentially modulate human dendritic cell activation. *Mol Immunol*  
618 51, 210-218.
- 619 Kuipers, M.E., Hokke, C.H., Smits, H.H., Nolte-'t Hoen, E.N.M., 2018. Pathogen-Derived  
620 Extracellular Vesicle-Associated Molecules That Affect the Host Immune System: An  
621 Overview. *Front Microbiol* 9, 2182.
- 622 Laan, L.C., Williams, A.R., Stavenhagen, K., Giera, M., Kooij, G., Vlasakov, I., Kalay, H.,  
623 Kringel, H., Nejsun, P., Thamsborg, S.M., Wuhrer, M., Dijkstra, C.D., Cummings, R.D.,  
624 van Die, I., 2017. The whipworm (*Trichuris suis*) secretes prostaglandin E2 to suppress  
625 proinflammatory properties in human dendritic cells. *FASEB J* 31, 719-731.
- 626 Lee, A., O'Rourke, J.L., Barrington, P.J., Trust, T.J., 1986. Mucus colonization as a  
627 determinant of pathogenicity in intestinal infection by *Campylobacter jejuni*: a mouse cecal  
628 model. *Infect Immun* 51, 536-546.
- 629 Leroux, L.P., Nasr, M., Valanparambil, R., Tam, M., Rosa, B.A., Siciliani, E., Hill, D.E.,  
630 Zarlenga, D.S., Jaramillo, M., Weinstock, J.V., Geary, T.G., Stevenson, M.M., Urban, J.F.,  
631 Jr., Mitreva, M., Jardim, A., 2018. Analysis of the *Trichuris suis* excretory/secretory  
632 proteins as a function of life cycle stage and their immunomodulatory properties. *Sci Rep*  
633 8, 15921.
- 634 Li, M., Izipisua Belmonte, J.C., 2019. Organoids - Preclinical Models of Human Disease. *N*  
635 *Engl J Med* 380, 569-579.
- 636 Liu, Y., Olagnier, D., Lin, R., 2016. Host and Viral Modulation of RIG-I-Mediated Antiviral  
637 Immunity. *Front Immunol* 7, 662.
- 638 Love, M.I., Huber, W., Anders, S., 2014. Moderated estimation of fold change and  
639 dispersion for RNA-seq data with DESeq2. *Genome Biol* 15, 550.
- 640 Luo, X.C., Chen, Z.H., Xue, J.B., Zhao, D.X., Lu, C., Li, Y.H., Li, S.M., Du, Y.W., Liu, Q.,  
641 Wang, P., Liu, M., Huang, L., 2019. Infection by the parasitic helminth *Trichinella spiralis*  
642 activates a *Tas2r*-mediated signaling pathway in intestinal tuft cells. *Proc Natl Acad Sci U*  
643 *S A* 116, 5564-5569.
- 644 McFarlane, A.J., McSorley, H.J., Davidson, D.J., Fitch, P.M., Errington, C., Mackenzie,  
645 K.J., Gollwitzer, E.S., Johnston, C.J.C., MacDonald, A.S., Edwards, M.R., Harris, N.L.,  
646 Marsland, B.J., Maizels, R.M., Schwarze, J., 2017. Enteric helminth-induced type I  
647 interferon signaling protects against pulmonary virus infection through interaction with the  
648 microbiota. *J Allergy Clin Immunol* 140, 1068-1078 e1066.

- 649 McGuckin, M.A., Linden, S.K., Sutton, P., Florin, T.H., 2011. Mucin dynamics and enteric  
650 pathogens. *Nat Rev Microbiol* 9, 265-278.
- 651 Miyoshi, H., Stappenbeck, T.S., 2013. In vitro expansion and genetic modification of  
652 gastrointestinal stem cells in spheroid culture. *Nat Protoc* 8, 2471-2482.
- 653 Mowat, A.M., Agace, W.W., 2014. Regional specialization within the intestinal immune  
654 system. *Nature reviews. Immunology* 14, 667-685.
- 655 Nguyen, T.L., Vieira-Silva, S., Liston, A., Raes, J., 2015. How informative is the mouse for  
656 human gut microbiota research? *Dis Model Mech* 8, 1-16.
- 657 Perng, Y.C., Lenschow, D.J., 2018. ISG15 in antiviral immunity and beyond. *Nat Rev*  
658 *Microbiol* 16, 423-439.
- 659 Pongpech, P., Hentges, D.J., Marsh, W.W., Eberle, M.E., 1989. Effect of streptomycin  
660 administration on association of enteric pathogens with cecal tissue of mice. *Infect Immun*  
661 57, 2092-2097.
- 662 Reynolds, L.A., Harcus, Y., Smith, K.A., Webb, L.M., Hewitson, J.P., Ross, E.A., Brown,  
663 S., Uematsu, S., Akira, S., Gray, D., Gray, M., MacDonald, A.S., Cunningham, A.F.,  
664 Maizels, R.M., 2014. MyD88 signaling inhibits protective immunity to the gastrointestinal  
665 helminth parasite *Heligmosomoides polygyrus*. *J Immunol* 193, 2984-2993.
- 666 Sato, T., Clevers, H., 2013. Growing self-organizing mini-guts from a single intestinal stem  
667 cell: mechanism and applications. *Science* 340, 1190-1194.
- 668 Sato, T., Stange, D.E., Ferrante, M., Vries, R.G., Van Es, J.H., Van den Brink, S., Van  
669 Houdt, W.J., Pronk, A., Van Gorp, J., Siersema, P.D., Clevers, H., 2011. Long-term  
670 expansion of epithelial organoids from human colon, adenoma, adenocarcinoma, and  
671 Barrett's epithelium. *Gastroenterology* 141, 1762-1772.
- 672 Sato, T., Vries, R.G., Snippert, H.J., van de Wetering, M., Barker, N., Stange, D.E., van  
673 Es, J.H., Abo, A., Kujala, P., Peters, P.J., Clevers, H., 2009. Single Lgr5 stem cells build  
674 crypt-villus structures in vitro without a mesenchymal niche. *Nature* 459, 262-265.
- 675 Shears, R.K., Bancroft, A.J., Hughes, G.W., Grencis, R.K., Thornton, D.J., 2018a.  
676 Extracellular vesicles induce protective immunity against *Trichuris muris*. *Parasite Immunol*  
677 40, e12536.
- 678 Shears, R.K., Bancroft, A.J., Sharpe, C., Grencis, R.K., Thornton, D.J., 2018b. Vaccination  
679 Against Whipworm: Identification of Potential Immunogenic Proteins in *Trichuris muris*  
680 Excretory/Secretory Material. *Sci Rep* 8, 4508.



- 681 Smallwood, T.B., Giacomini, P.R., Loukas, A., Mulvenna, J.P., Clark, R.J., Miles, J.J.,  
682 2017. Helminth Immunomodulation in Autoimmune Disease. *Front Immunol* 8, 453.
- 683 Takebe, T., Wells, J.M., 2019. Organoids by design. *Science* 364, 956-959.
- 684 Tilney, L.G., Connelly, P.S., Guild, G.M., Vranich, K.A., Artis, D., 2005. Adaptation of a  
685 nematode parasite to living within the mammalian epithelium. *J Exp Zool A Comp Exp Biol*  
686 303, 927-945.
- 687 Tritten, L., Tam, M., Vargas, M., Jardim, A., Stevenson, M.M., Keiser, J., Geary, T.G.,  
688 2017. Excretory/secretory products from the gastrointestinal nematode *Trichuris muris*.  
689 *Exp Parasitol* 178, 30-36.
- 690 Varyani, F., Fleming, J.O., Maizels, R.M., 2017. Helminths in the gastrointestinal tract as  
691 modulators of immunity and pathology. *Am J Physiol Gastrointest Liver Physiol* 312, G537-  
692 G549.
- 693 Webb, L.M., Lundie, R.J., Borger, J.G., Brown, S.L., Connor, L.M., Cartwright, A.N.,  
694 Dougall, A.M., Wilbers, R.H., Cook, P.C., Jackson-Jones, L.H., Phythian-Adams, A.T.,  
695 Johansson, C., Davis, D.M., Dewals, B.G., Ronchese, F., MacDonald, A.S., 2017. Type I  
696 interferon is required for T helper (Th) 2 induction by dendritic cells. *EMBO J* 36, 2404-  
697 2418.
- 698 White, R., Kumar, S., Chow, F.W.N., Robertson, E., Hayes, K.S., Grencis, R.K., Duque-  
699 Correa, M.A., Buck, A., 2020. Extracellular vesicles from *Heligmosomoides bakeri* and  
700 *Trichuris muris* contain distinct small RNAs that could enable niche specificity in the host.  
701 *International Journal of Parasitology*.
- 702 Yates, A.D., Achuthan, P., Akanni, W., Allen, J., Allen, J., Alvarez-Jarreta, J., Amode,  
703 M.R., Armean, I.M., Azov, A.G., Bennett, R., Bhai, J., Billis, K., Boddu, S., Marugan, J.C.,  
704 Cummins, C., Davidson, C., Dodiya, K., Fatima, R., Gall, A., Giron, C.G., Gil, L., Grego, T.,  
705 Haggerty, L., Haskell, E., Hourlier, T., Izuogu, O.G., Janacek, S.H., Juettemann, T., Kay,  
706 M., Lavidas, I., Le, T., Lemos, D., Martinez, J.G., Maurel, T., McDowall, M., McMahon, A.,  
707 Mohanan, S., Moore, B., Nuhn, M., Oheh, D.N., Parker, A., Parton, A., Patricio, M.,  
708 Sakthivel, M.P., Abdul Salam, A.I., Schmitt, B.M., Schuilenburg, H., Sheppard, D.,  
709 Sycheva, M., Szuba, M., Taylor, K., Thormann, A., Threadgold, G., Vullo, A., Walts, B.,  
710 Winterbottom, A., Zadissa, A., Chakiachvili, M., Flint, B., Frankish, A., Hunt, S.E., G, I.I.,  
711 Kostadima, M., Langridge, N., Loveland, J.E., Martin, F.J., Morales, J., Mudge, J.M.,  
712 Muffato, M., Perry, E., Ruffier, M., Trevanion, S.J., Cunningham, F., Howe, K.L., Zerbino,  
713 D.R., Flicek, P., 2020. Ensembl 2020. *Nucleic acids research* 48, D682-D688.
- 714 Zaborin, A., Krezalek, M., Hyoju, S., Defazio, J.R., Setia, N., Belogortseva, N., Bindokas,  
715 V.P., Guo, Q., Zaborina, O., Alverdy, J.C., 2017. Critical role of microbiota within cecal  
716 crypts on the regenerative capacity of the intestinal epithelium following surgical stress.  
717 *Am J Physiol Gastrointest Liver Physiol* 312, G112-G122.



718 Zhang, X., Stappenbeck, T.S., White, A.C., Lavine, K.J., Gordon, J.I., Ornitz, D.M., 2006.  
719 Reciprocal epithelial-mesenchymal FGF signaling is required for cecal development.  
720 Development 133, 173-180.

721 **FIGURE LEGENDS**

722 **Figure 1. Caecaloid culture and differentiation.** Representative bright field microscopy  
723 images of caecaloids grown in the presence of 50% (**A**, cystic-undifferentiated  
724 morphology) or 30% of Wnt3A-conditioned medium (**B**, budding-differentiated morphology)  
725 and differentiated by reduction of concentration to 10%. (**C**) Images of caecaloids grown in  
726 30% of Wnt3A-conditioned medium in the absence (cystic-undifferentiated) or presence  
727 (budding-differentiated) of FGF-10. Scale bars 200µm. (**D**) Expression of marker genes  
728 measured by qRT-PCR for stem cells (*Lgr5*), enterocytes (*Alpi*), goblet cells (*Muc2*),  
729 Paneth cells (*Lyz1*) and enteroendocrine cells (*ChgrA*) in caecaloids grown in 50% and  
730 30% Wnt3A-conditioned medium and further differentiated by reduction of Wnt3A-  
731 conditioned medium from 30% to 10%. Results show the mean with standard deviation of  
732 results from 2 different caecaloid lines.

733

734 **Figure 2. Confocal microscopy characterisation of differentiated caecaloids.** Images  
735 of caecaloids expanded and further differentiated by reduction of Wnt3A-conditioned  
736 medium from 30% to 10%, showing the presence of all IEC populations. **A-D.** Confocal IF  
737 microscopy with antibodies staining (**A**) Ki-67, marker of proliferating cells, stem and TA  
738 cells; (**B**) Villin, identifying microvilli of enterocytes; (**C**) Chromogranin A expressing  
739 enteroendocrine cells; (**D**) Dclk-1, marker of tuft cells; and with the lectins UEA and SNA  
740 that bind mucus in goblet cells. DAPI stains nuclei and DiD the cell membranes. Scale bar  
741 50µm for A, B, C and E, 20µm for D. **G.** TEM images showing enterocytes, goblet and  
742 enteroendocrine cells present in caecaloids.

743

744 **Figure 3. Confocal microscopy characterisation enteroids.** Confocal IF microscopy  
745 images of enteroids, showing the presence of all IEC populations stained with antibodies  
746 for **(A)** Ki-67, marker of proliferating cells, stem and TA cells; **(B)** Villin, identifying microvilli  
747 of enterocytes; **(C)** Chromogranin A expressing enteroendocrine cells; **(D)** Dclk-1, marker  
748 of tuft cells; **(E)** Lysozyme expressing Paneth cells; and with the lectins UEA and SNA that  
749 bind mucus in goblet cells. DAPI stains nuclei and DiD the cell membranes. Scale bar  
750 50µm for A, B, D and E, 20µm for C.

751

752 **Figure 4. Comparison of cellular composition of enteroids, caecaloids and small**  
753 **intestine and caecum tissues by ImageStream.** Enteroids, caecaloids and IECs from  
754 small intestine and caecum were dissociated into single cells, stained with antibodies and  
755 lectins targeting enterocytes, enteroendocrine, Paneth and goblet cells and visualized by  
756 ImageStream. **A.** Bright field and fluorescence representative images of cellular  
757 populations. Scale bar 7µm. **B.** Percentages (median with interquartile range) of cellular  
758 populations identified by ImageStream. n=3. Note the consistency on the composition of  
759 organoids and the tissue of origin.

760

761 **Figure 5. Transcriptional response of caecaloids to microinjection of *T. muris* EVs.**  
762 **A.** Principal component (PC) analysis showing sample clustering across PC1 and PC2. **B.**  
763 Volcano plot showing transcriptional response to microinjection of *T. muris* EVs. Genes  
764 significantly differentially expressed (adjusted p value < 0.05) are indicated in red  
765 (absolute log<sub>2</sub> fold change > 1) or blue (absolute log<sub>2</sub> fold change < 1). **C.** Heat map of  
766 transformed and normalised expression counts for selected genes (mean of three  
767 replicates is represented). Viral response associated genes are associated with the GO

768 terms GO:0051607 and/or GO:0009615 by Innate DB (<https://www.innatedb.com/>) and/or  
769 Ensembl (<https://www.ensembl.org>).

770 **SUPPLEMENTARY FIGURE LEGENDS**

771 **Supplementary Figure 1. Lysozyme staining as a marker of Paneth cells in small**  
772 **intestine and caecum tissue and organoids.** Images of confocal IF microscopy with an  
773 antibody staining Lysozyme expressing Paneth cells in small intestine tissue and  
774 organoids **(A)**, which are not frequently found in caecal tissue and organoids **(B)**. DAPI  
775 stains nuclei and DiD the cell membranes. Scale bar 100µm.

776

777 **Supplementary Figure 2. Qualitative analysis of *T. muris* EVs by (A) Transmission EM**  
778 **and (B) Profile of EVs by Nanosight, at 1:1000 dilution.**

779

780 **Supplementary Figure 3. Gating strategy ImageStream.** Gates were set up to select for  
781 single, in-focus cells using the guided analysis tools for focused and single cell analysis  
782 from IDEAS. Specifically, normalised frequency versus Gradient RMS on BF for all events  
783 was used to reject out-of-focus events and draw the Best focus gate. On the Best focus  
784 population, Aspect ratio versus Area for BF was used to exclude beads and select for  
785 single cell events (Single cells gate). “Single cells” were further gated based on nuclear  
786 stain to select for optimum nuclear staining by looking at Intensity for emission channel  
787 (Ch) 7 versus Area for BF (Dapi gate). All further analysis to quantify epithelial cell  
788 populations was performed using “Dapi gate” as initial population. Intensity Ch6 (SSC)  
789 versus Ch3 (AF555) or Intensity Ch2 (FITC) was used for determining enterocyte,  
790 enteroendocrine, Paneth and goblet cell populations. To measure the stem cell population,  
791 the Features Finder tool from IDEAS was used, with Width Object versus Major Axis  
792 Object on BF used for gating.



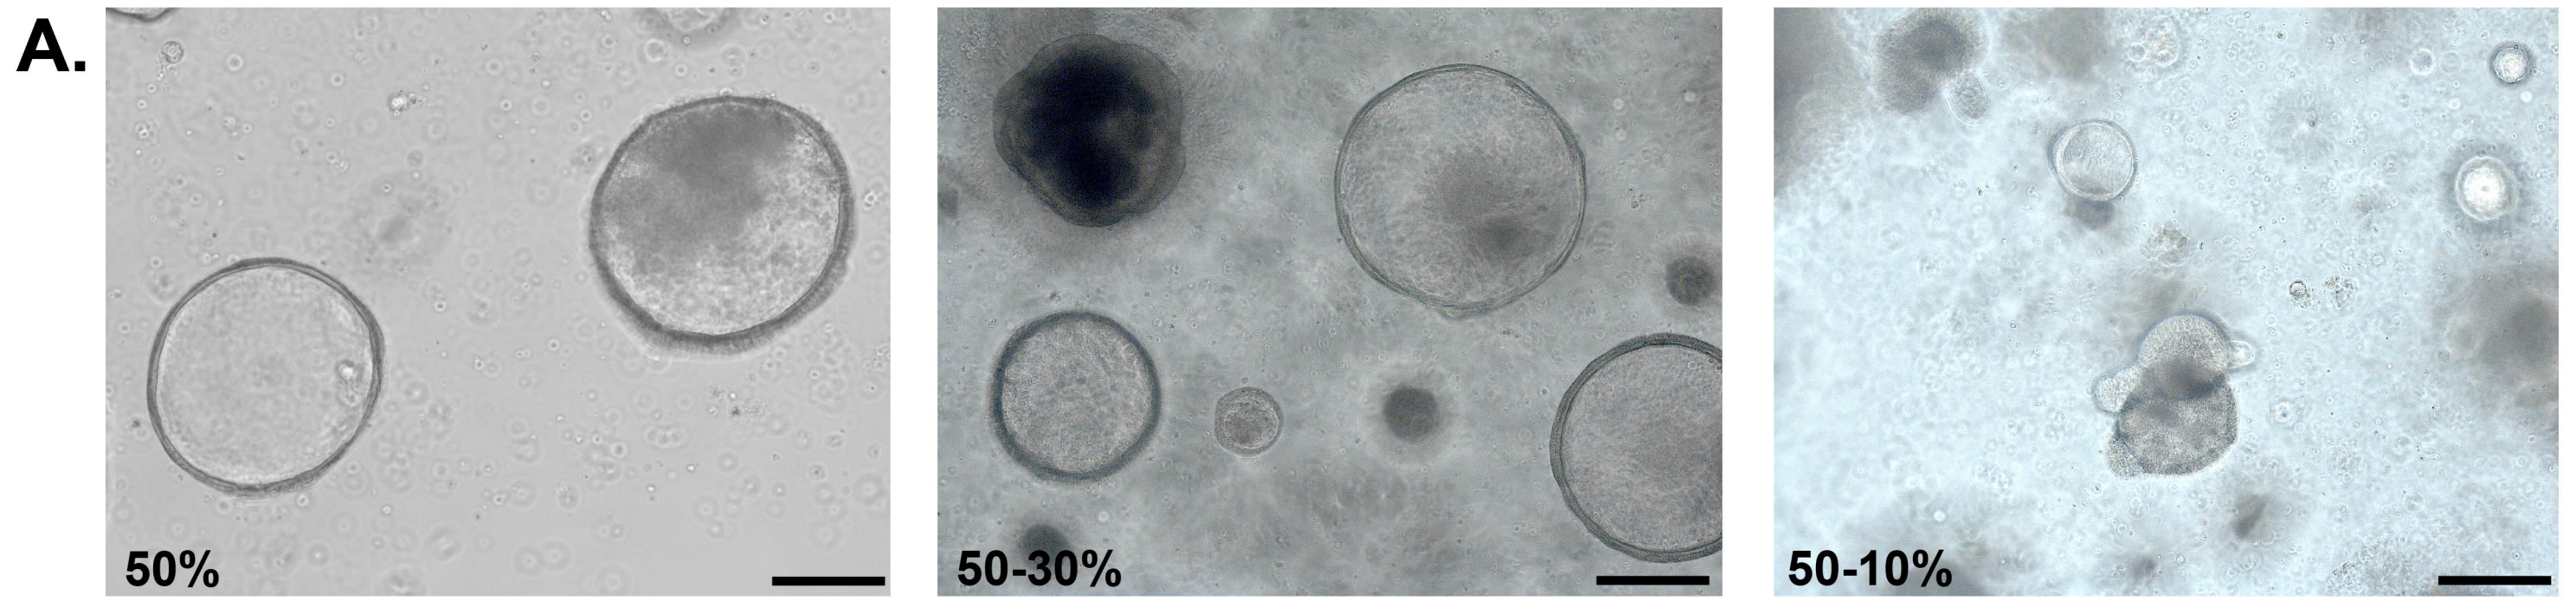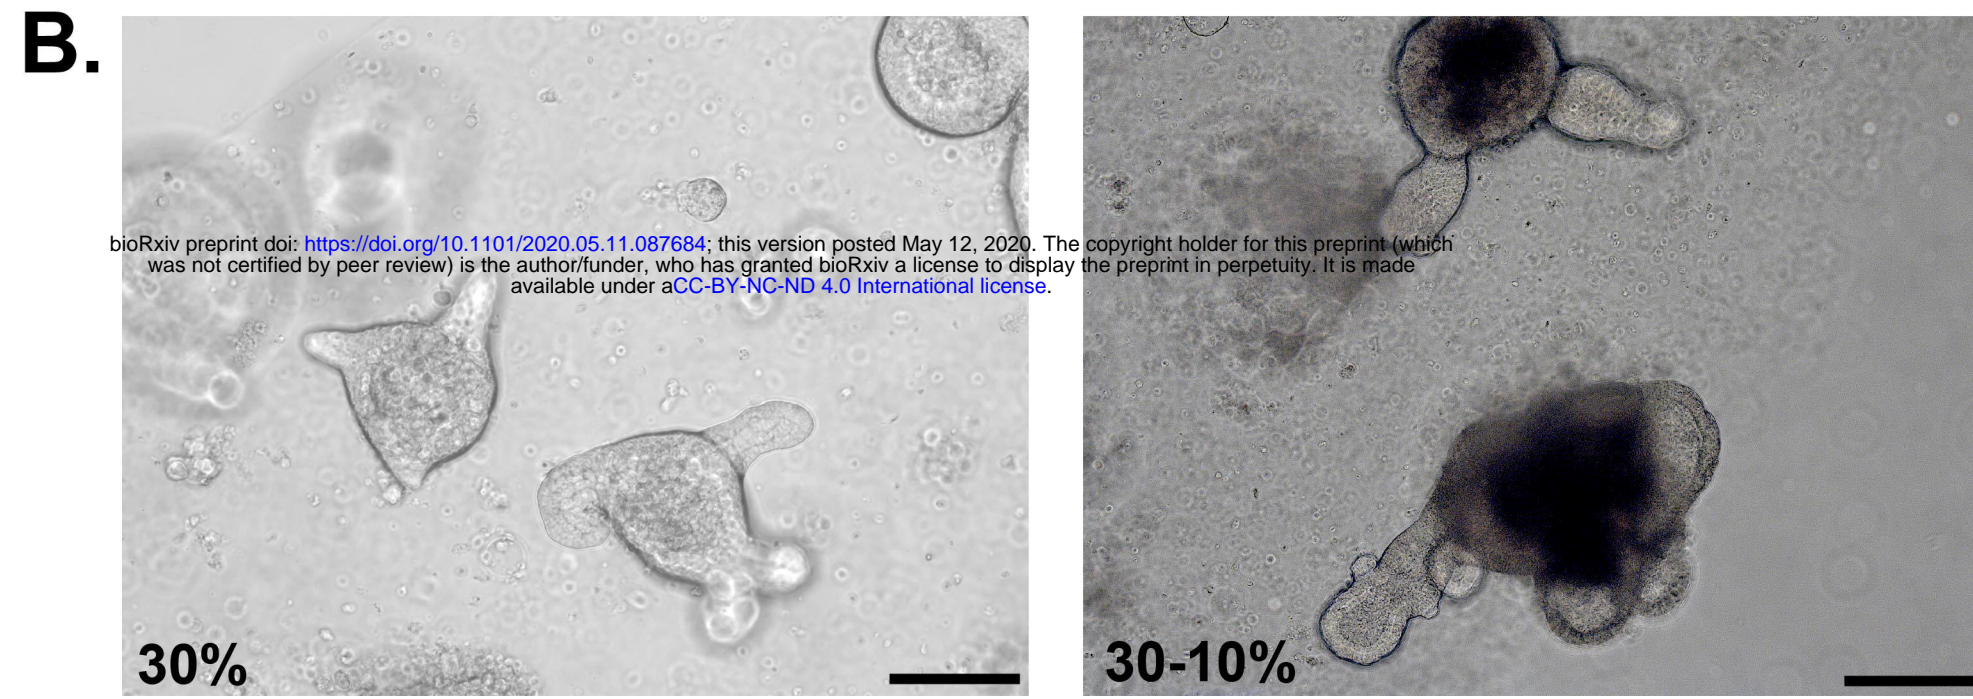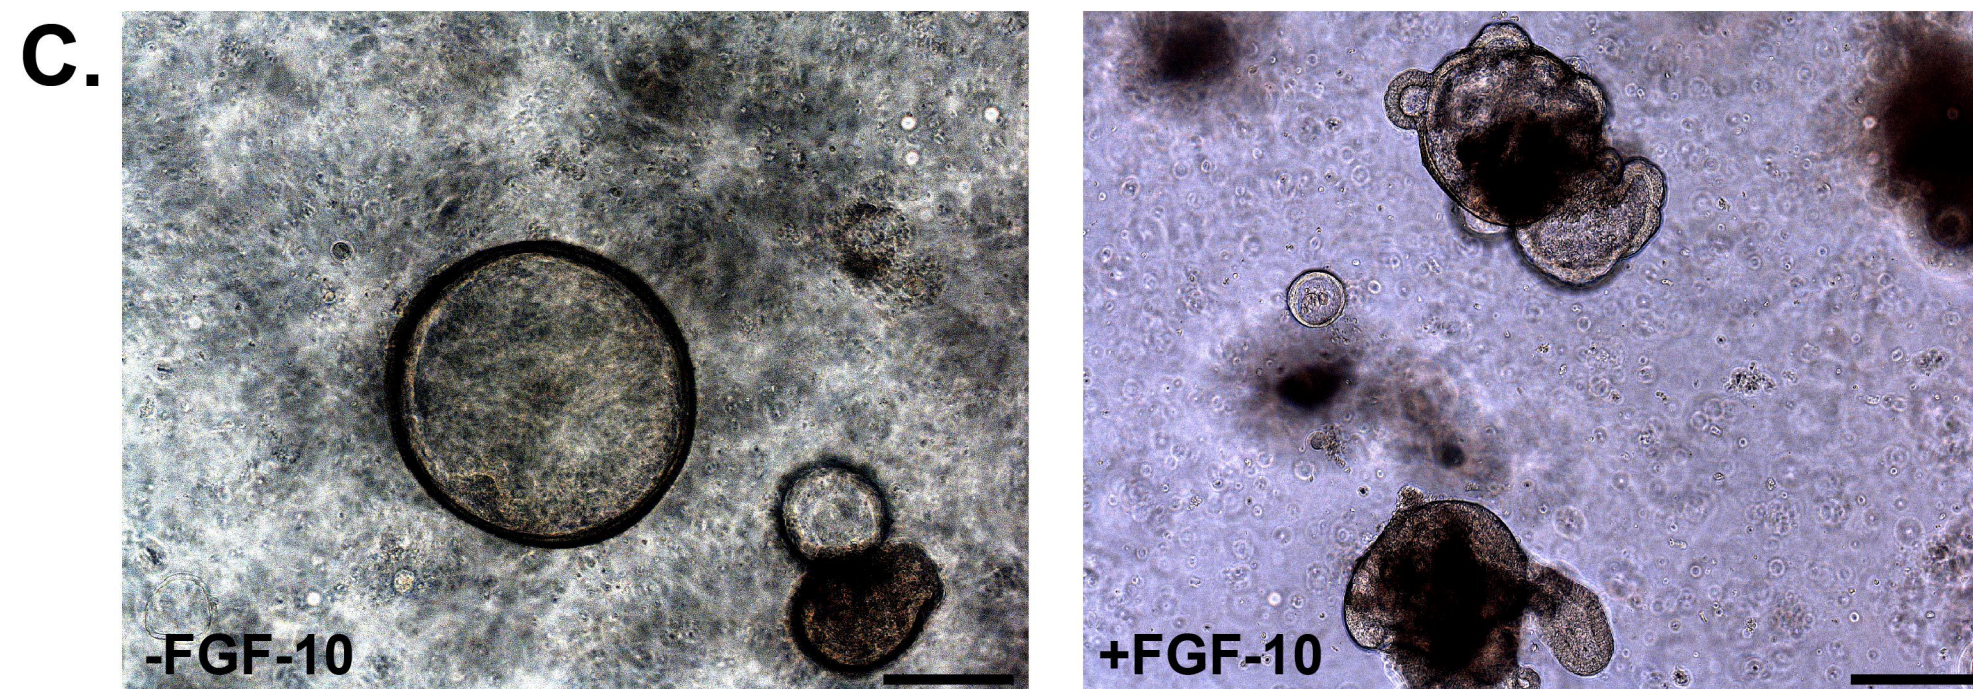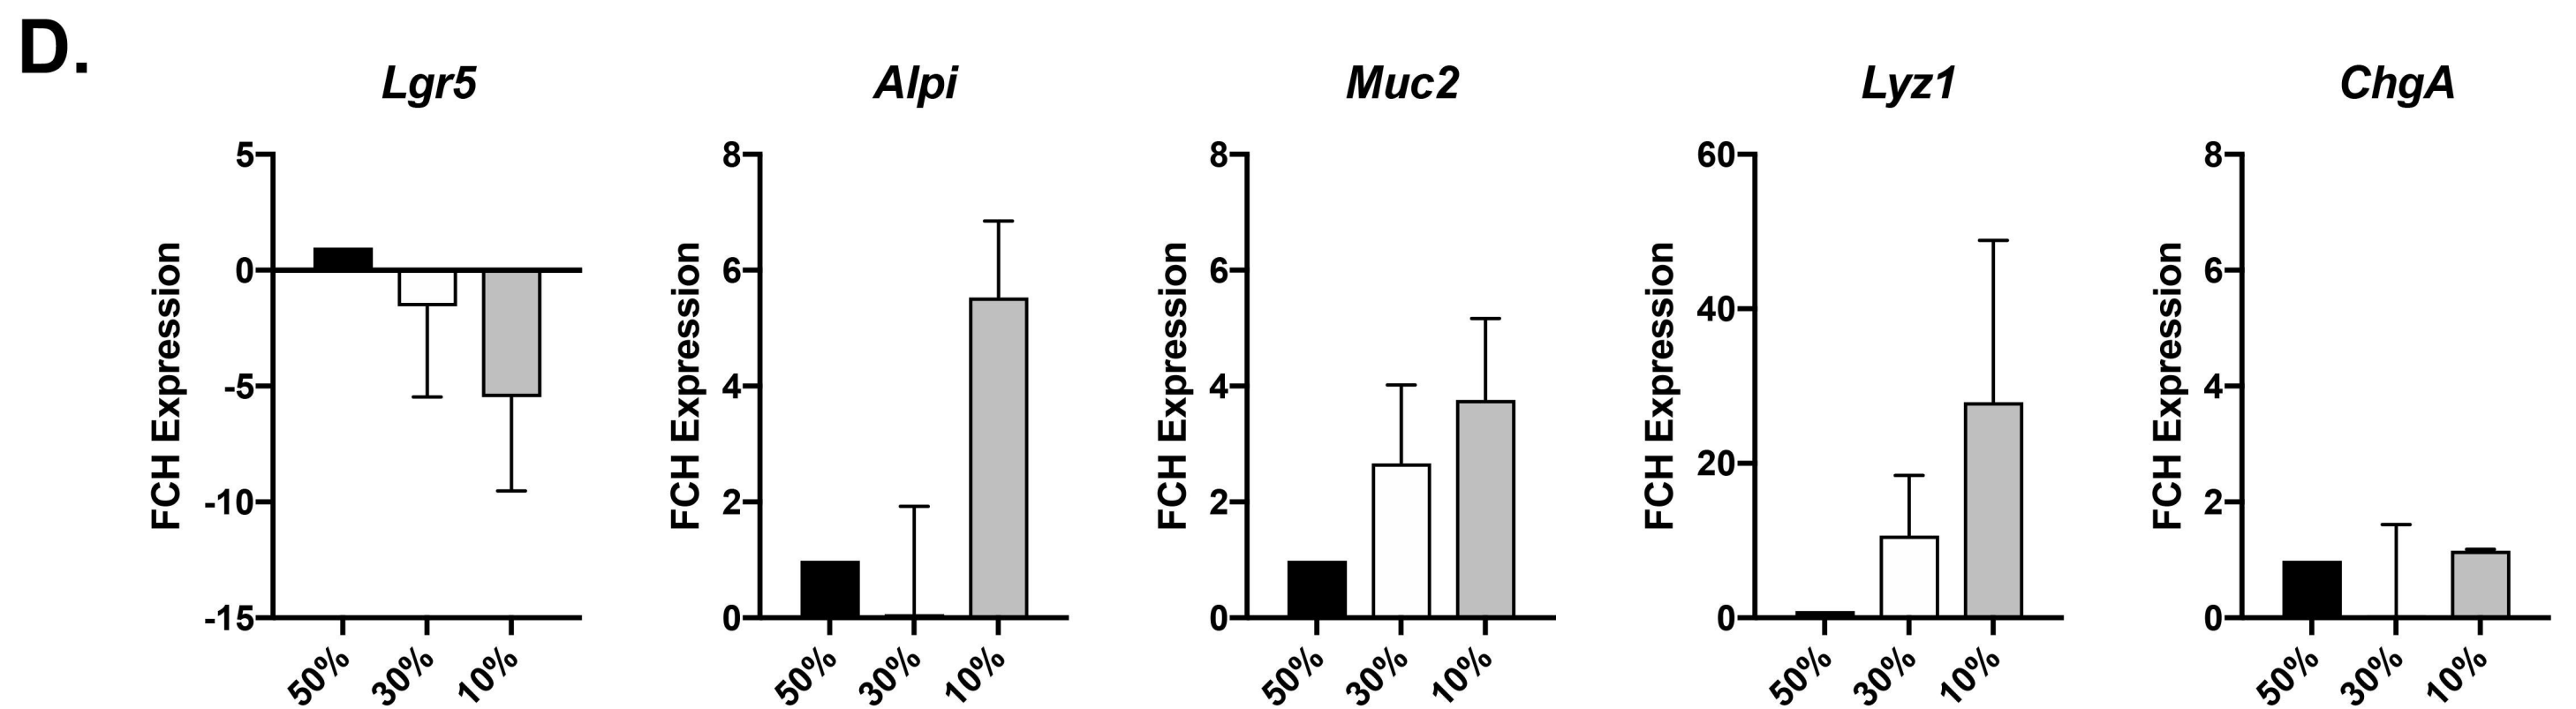



DID - Membranes

DAPI-Nuclei

UEA-SNA - Goblet cells

Merge

A.

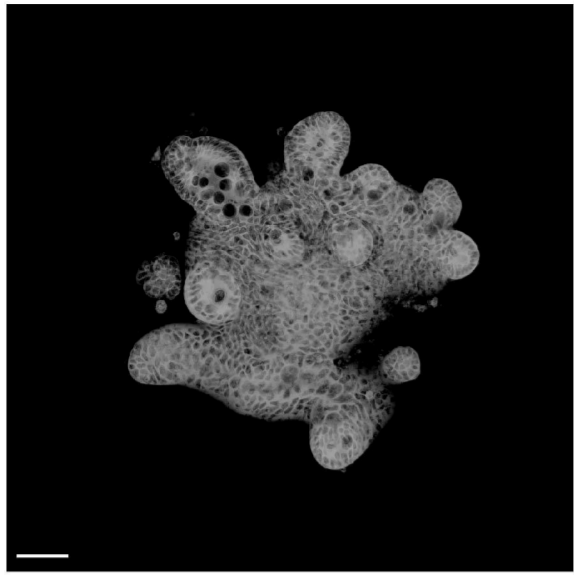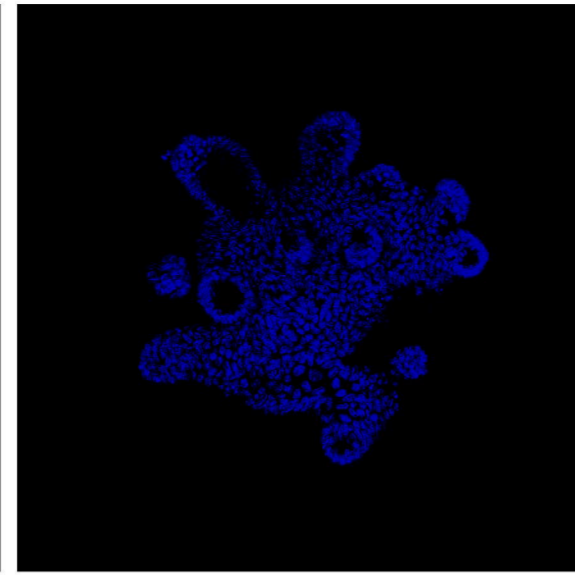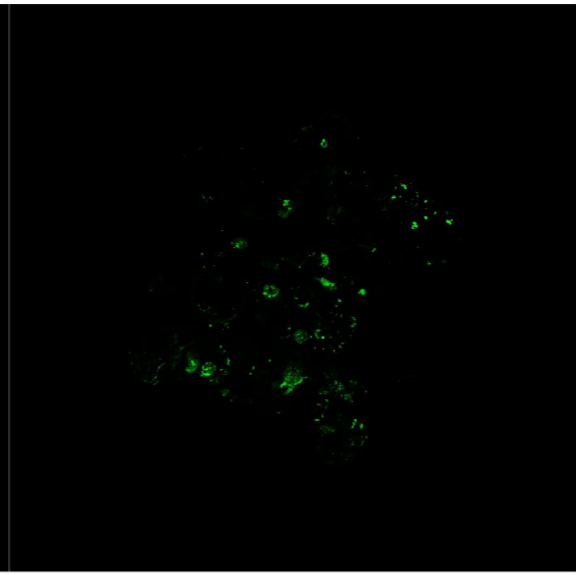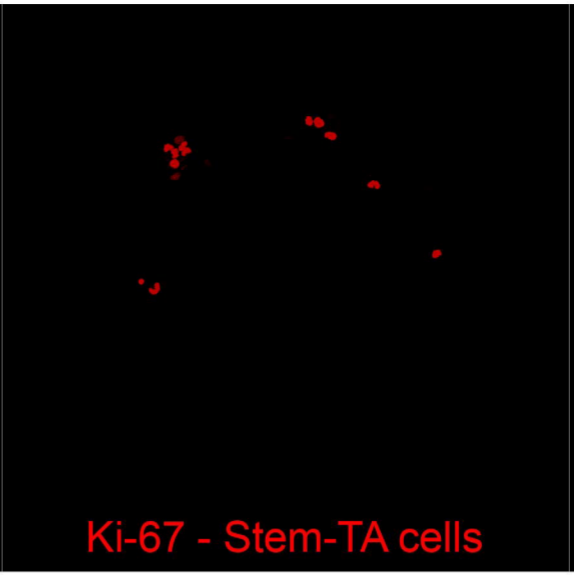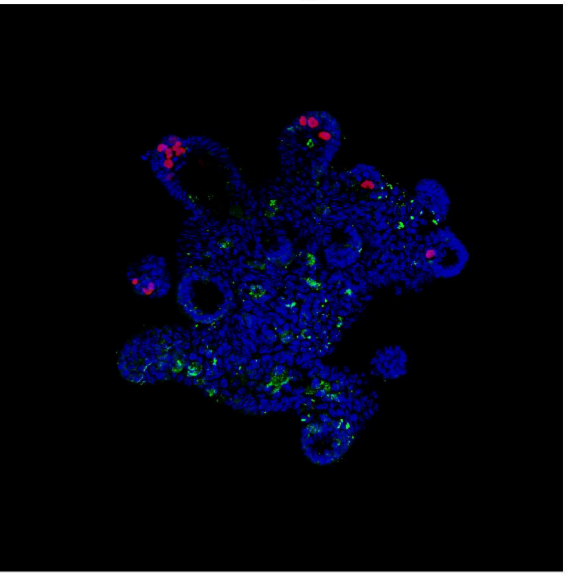

Ki-67 - Stem-TA cells

B.

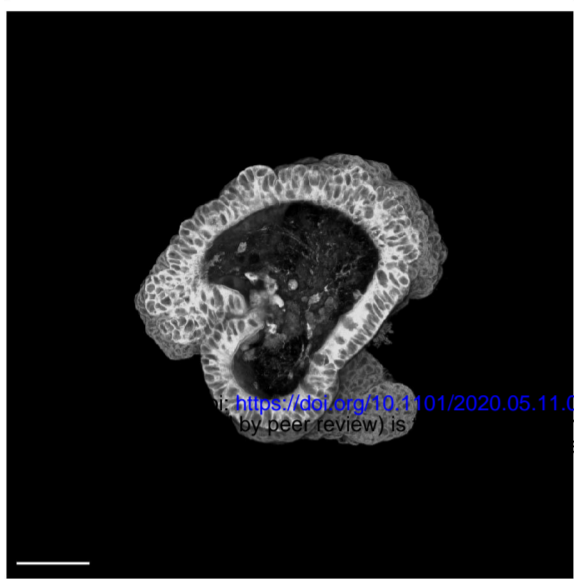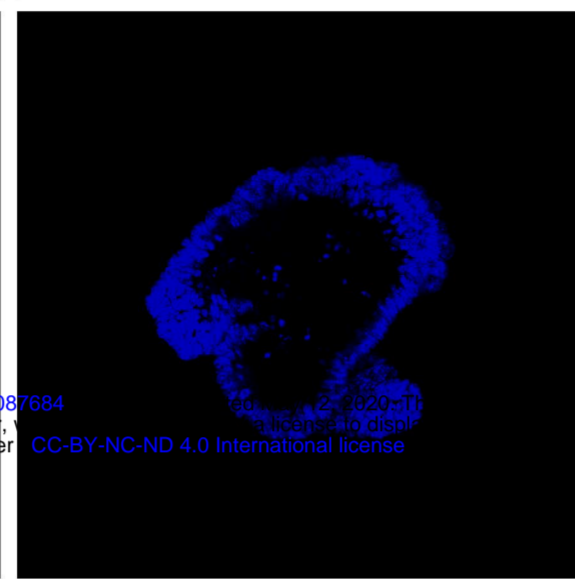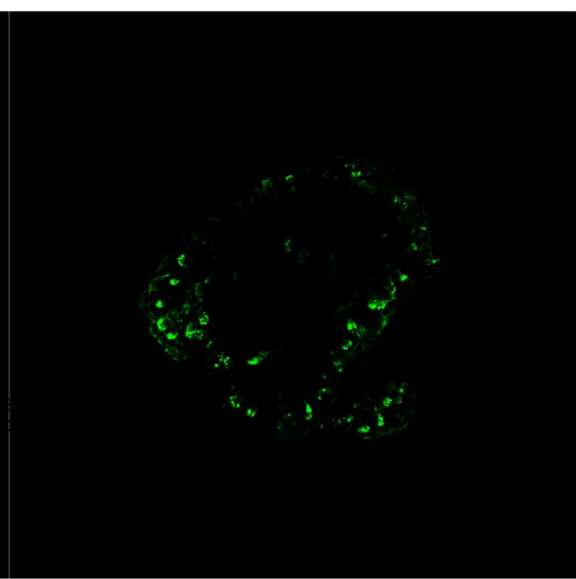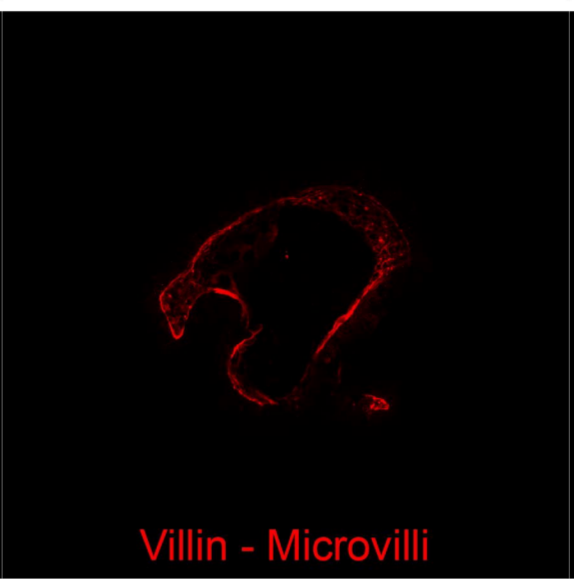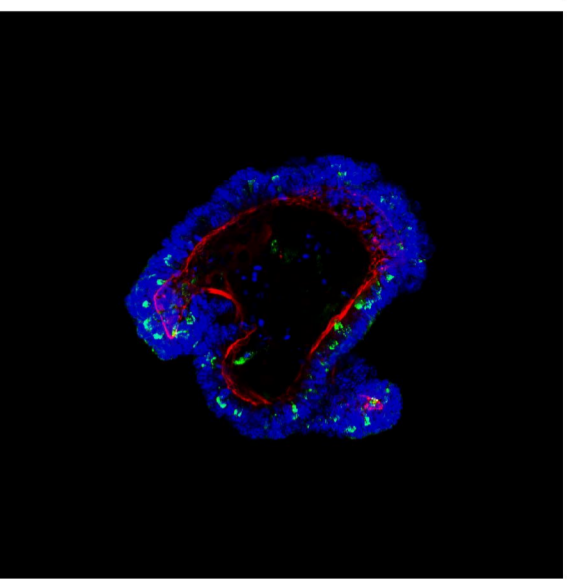

Villin - Microvilli

C.

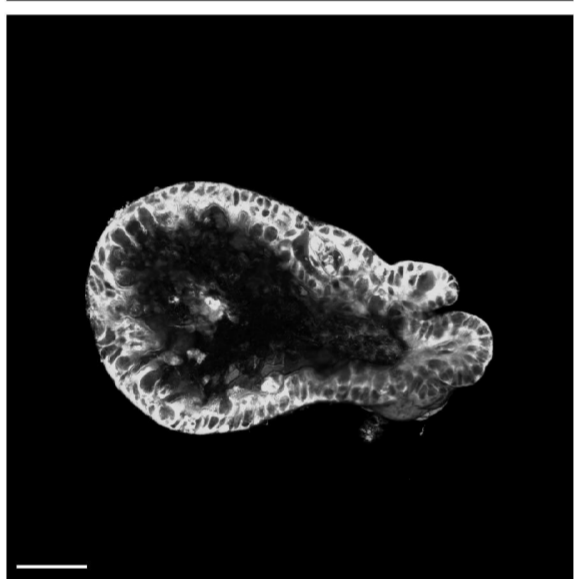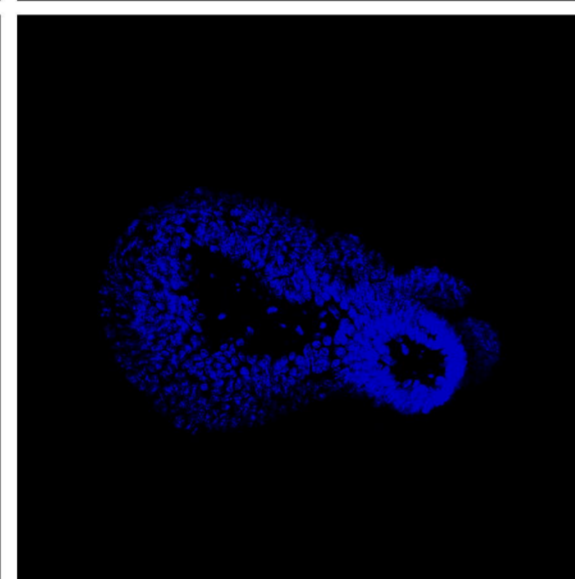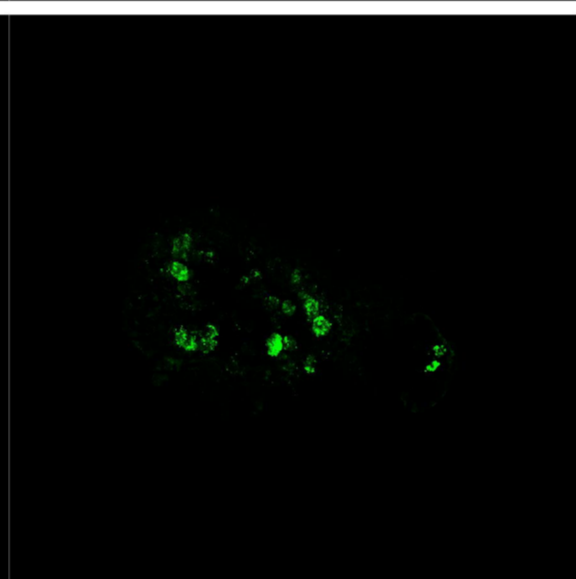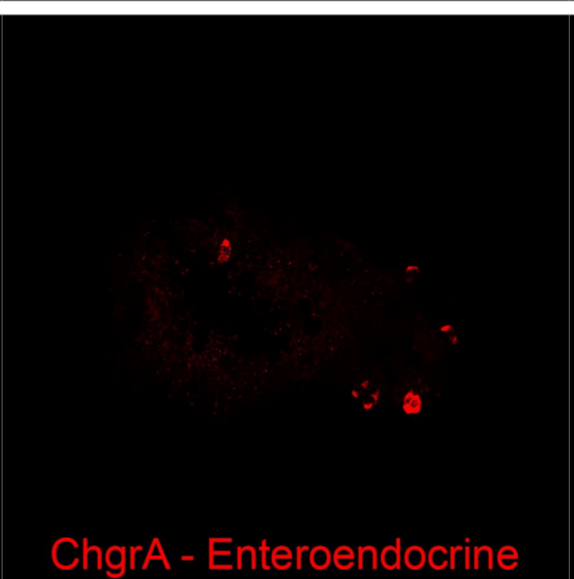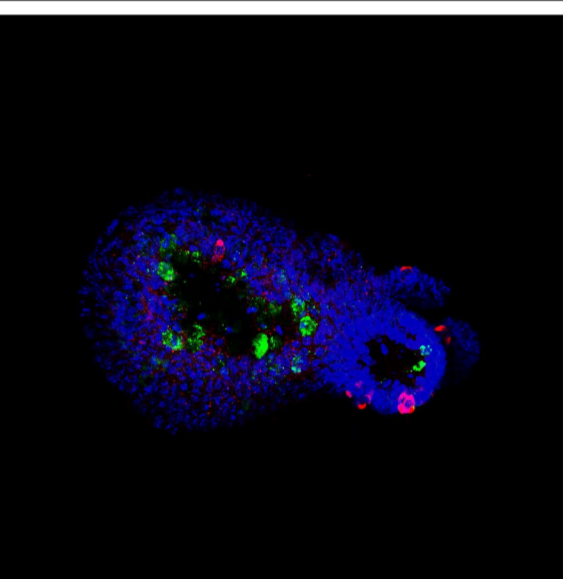

ChgrA - Enteroendocrine

D.

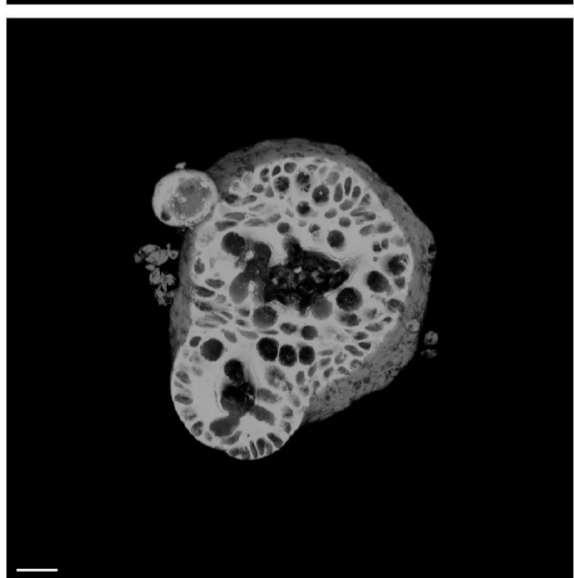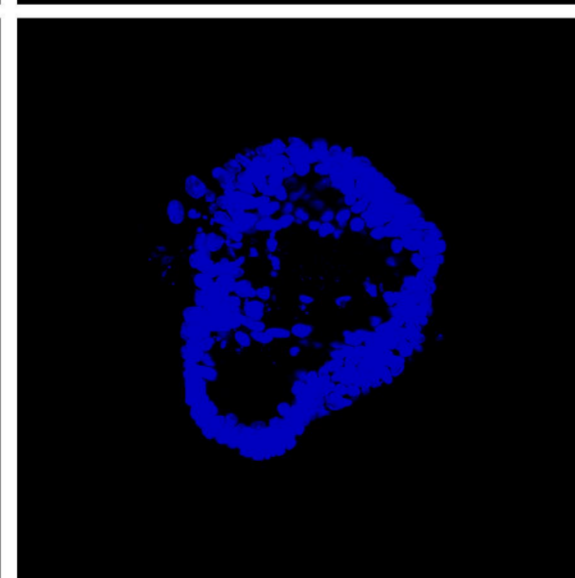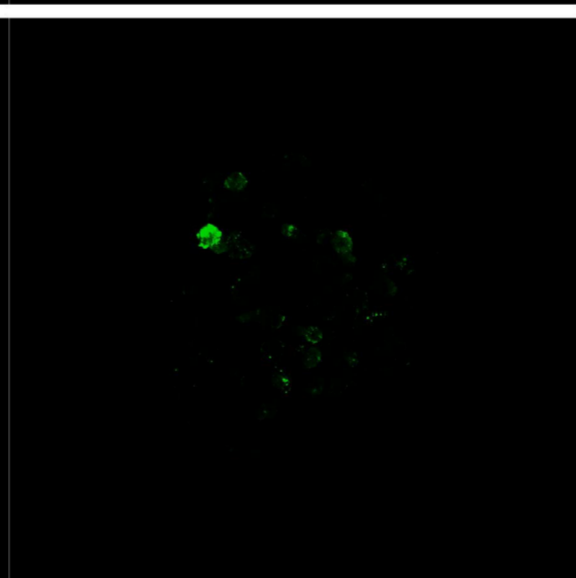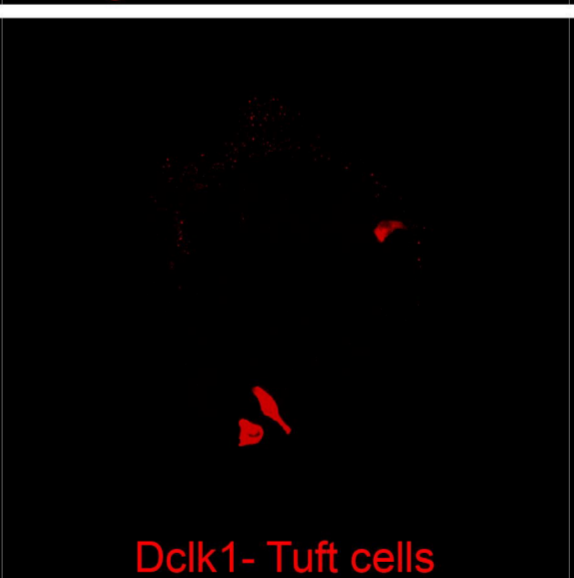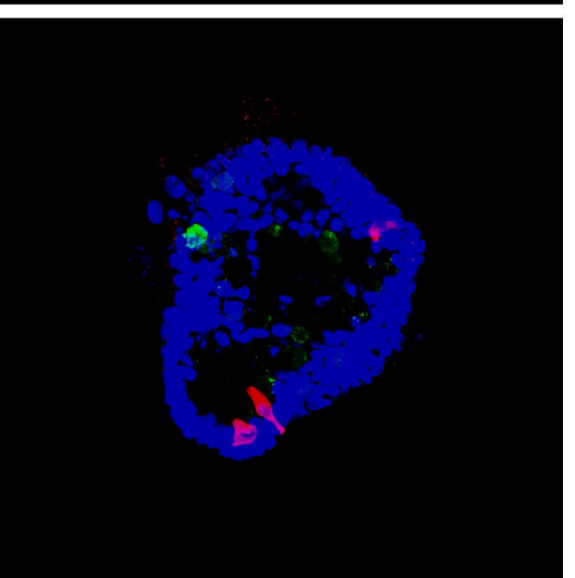

Dclk1 - Tuft cells

E.

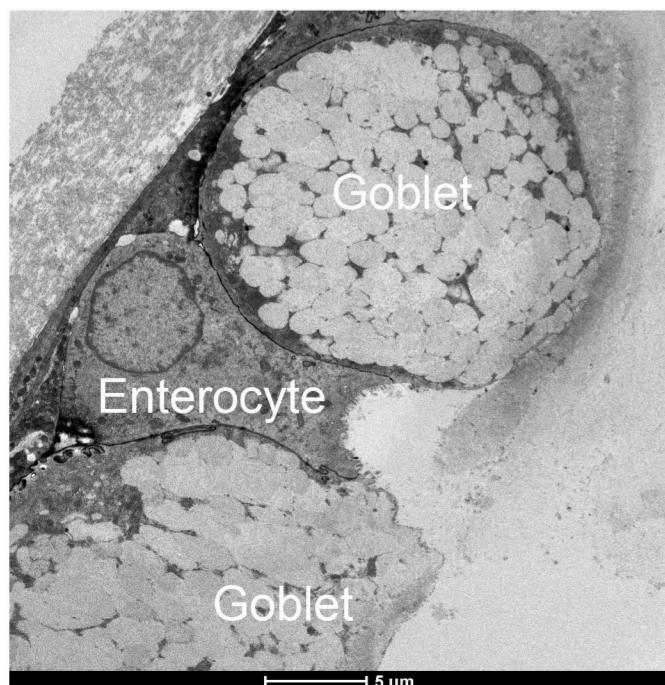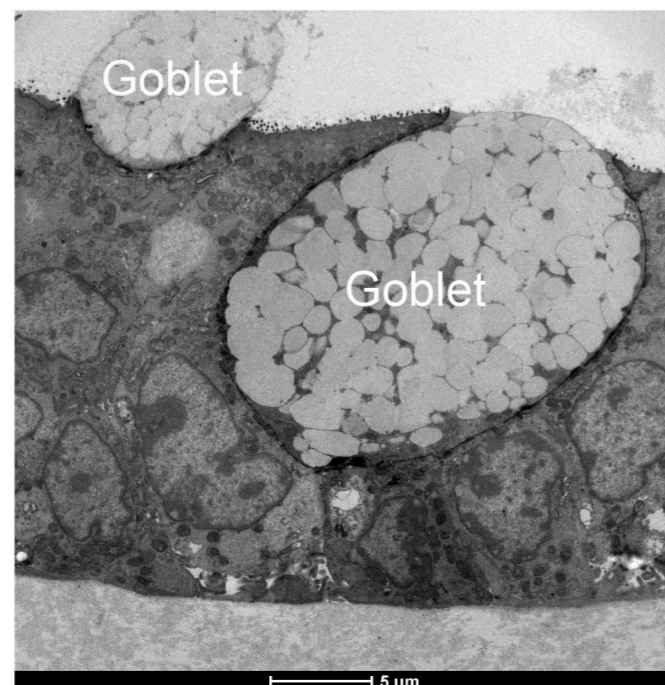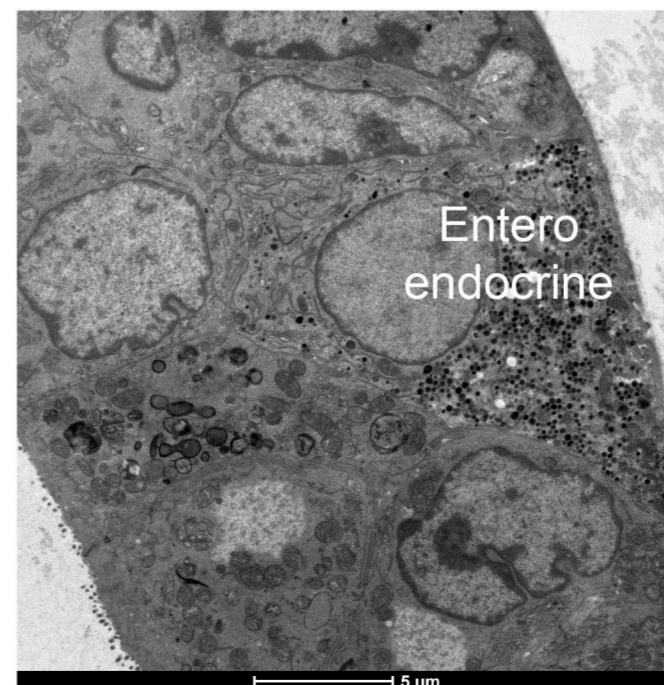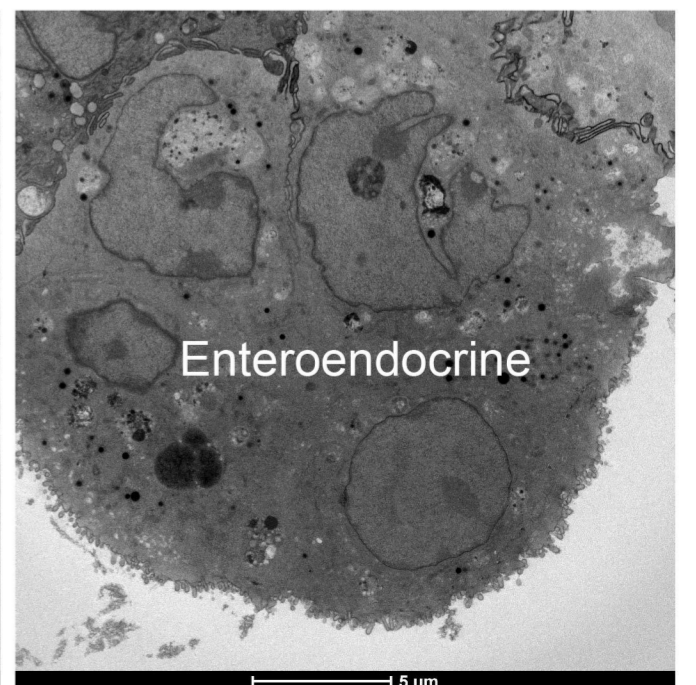

Goblet

Enterocyte

Goblet

Goblet

Goblet

Entero  
endocrine

Enteroendocrine

5 um

5 um

5 um

5 um



DID - Membranes

DAPI-Nuclei

UEA-SNA - Goblet cells

Merge

A.

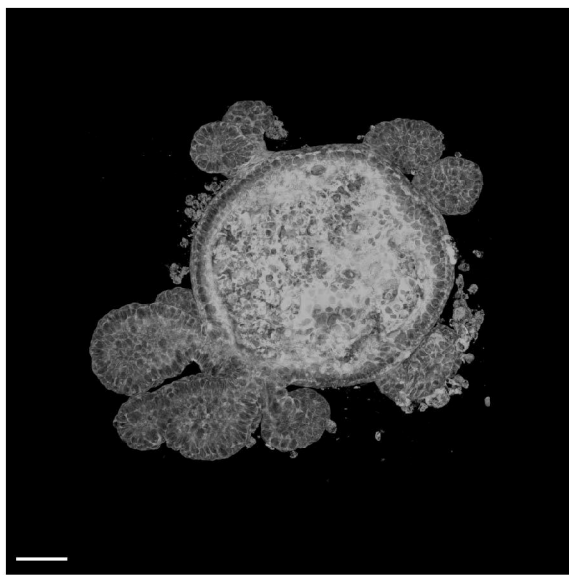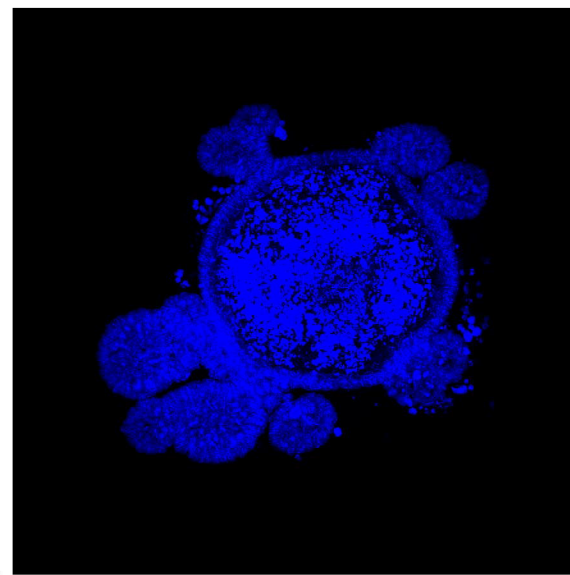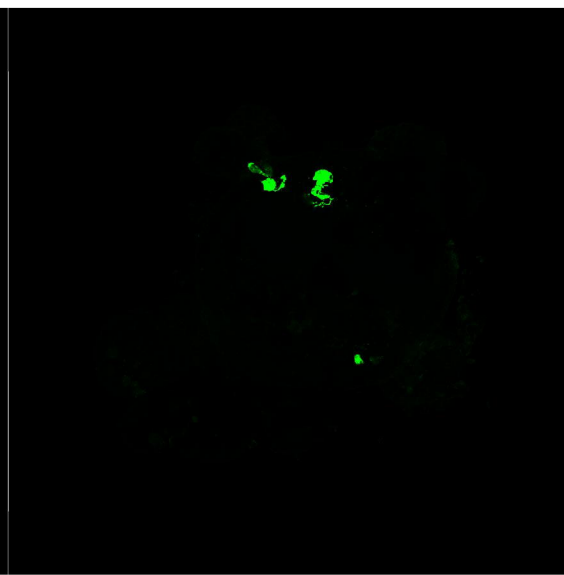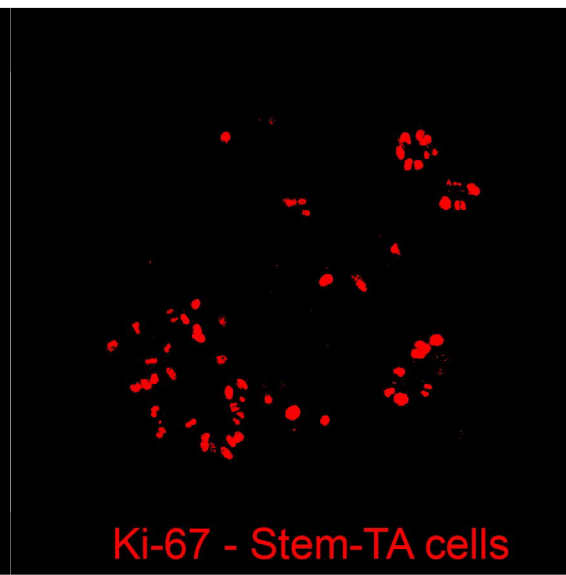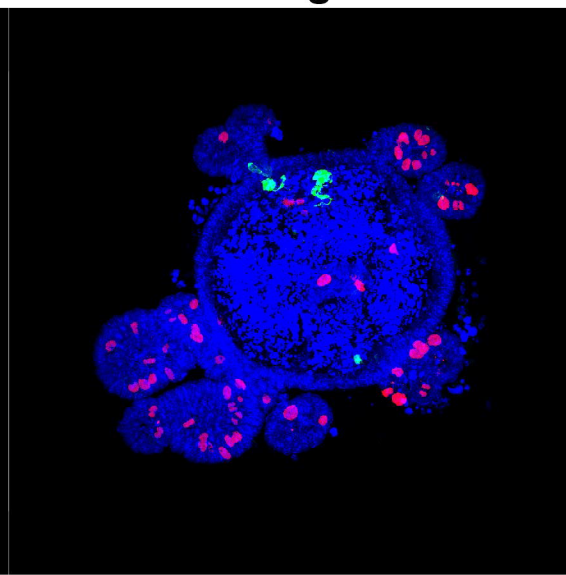

B.

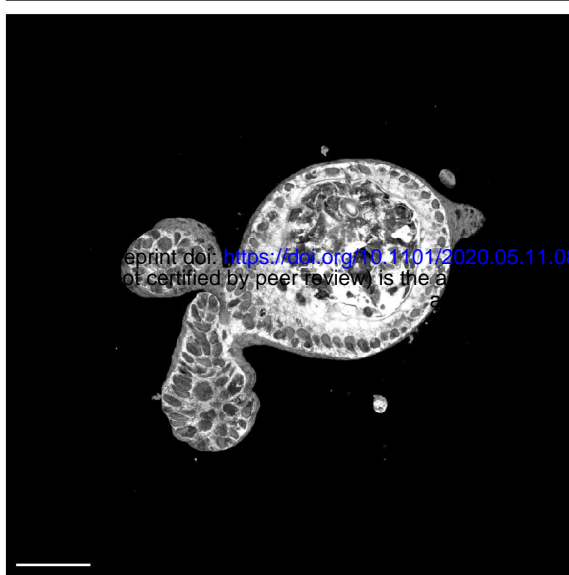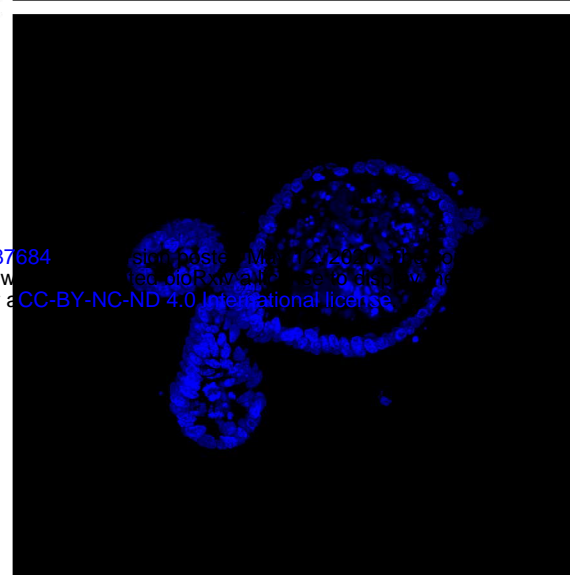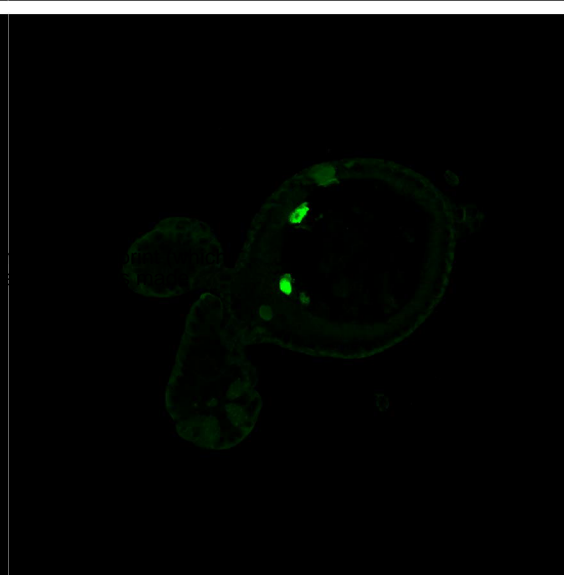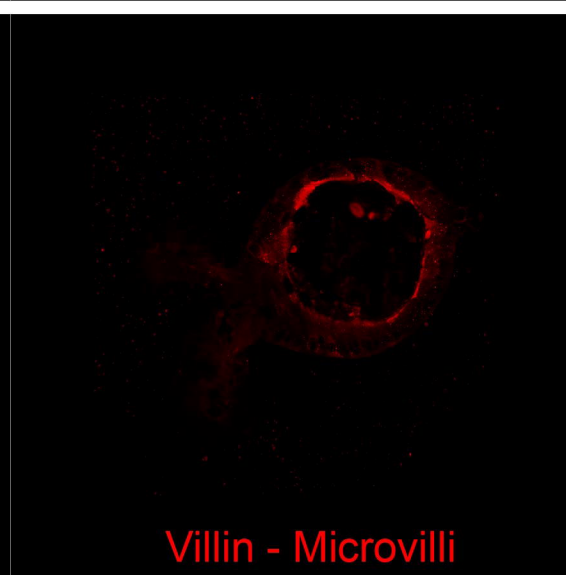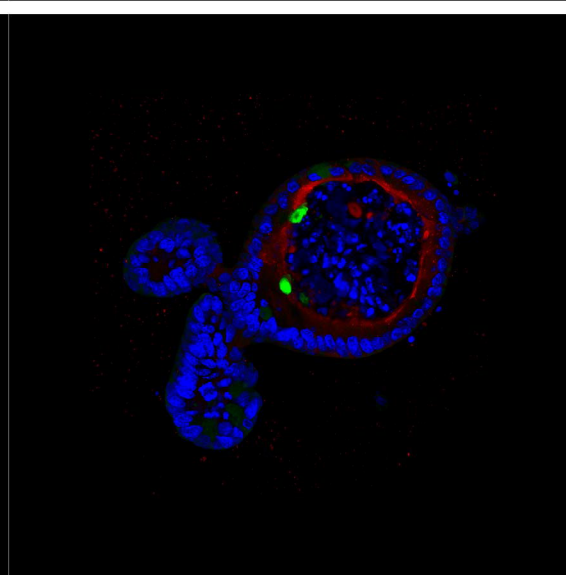

C.

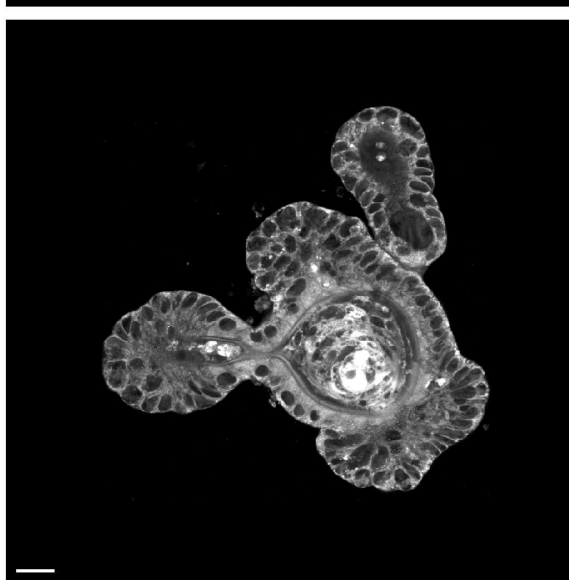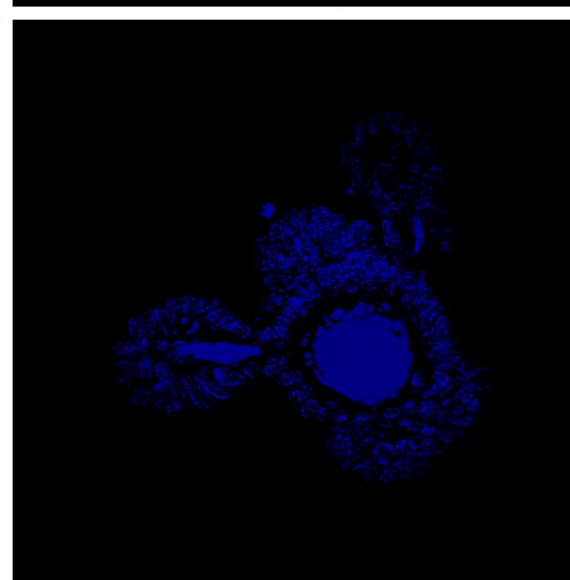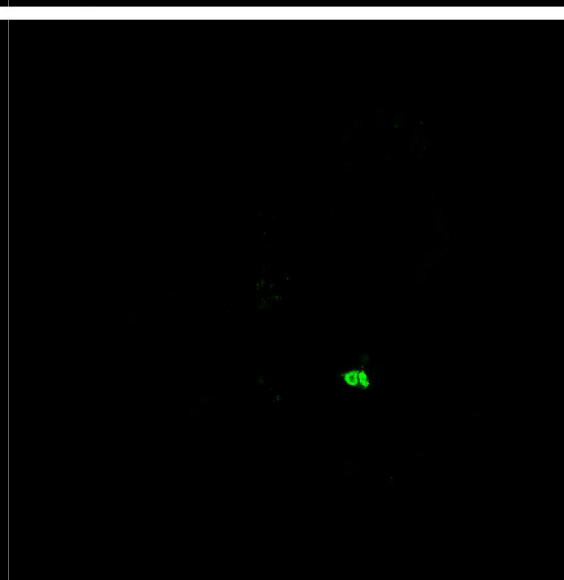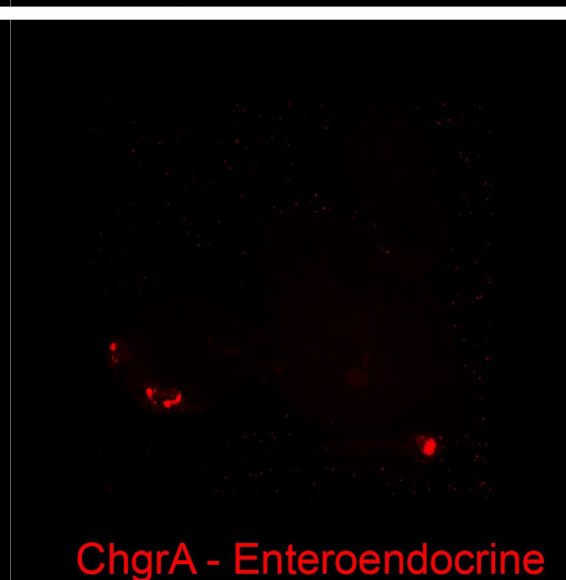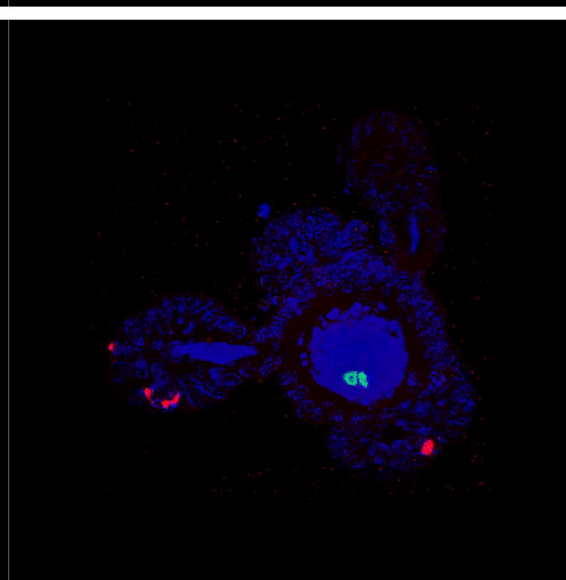

D.

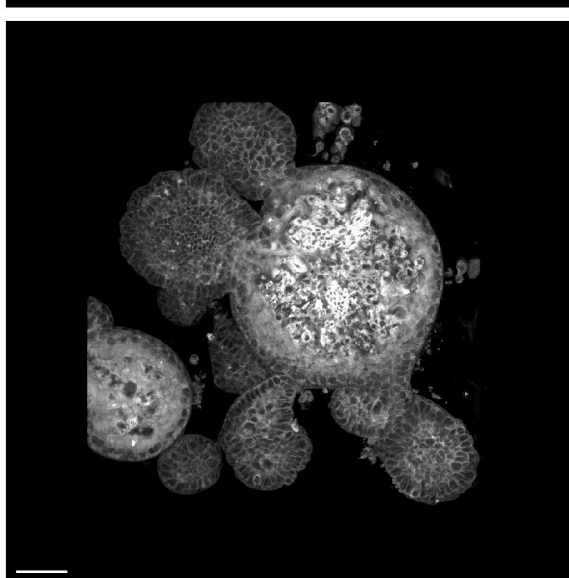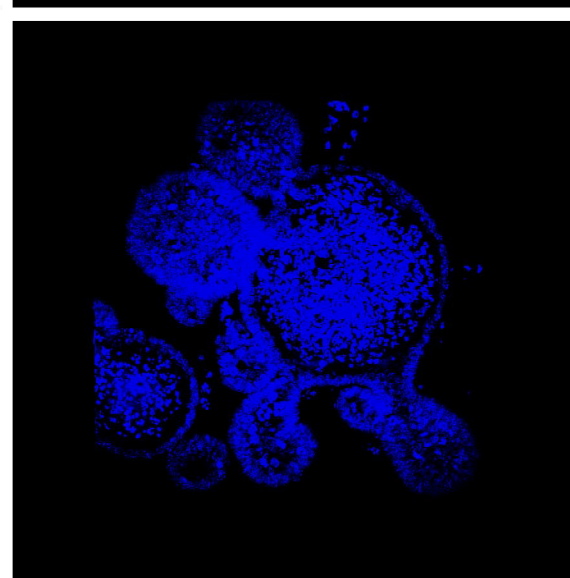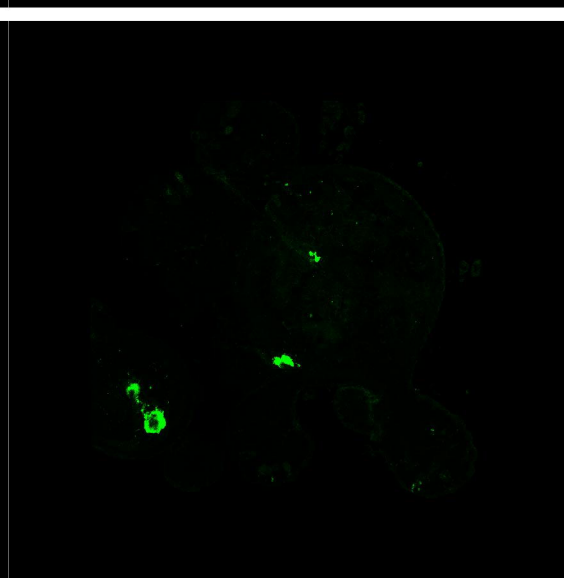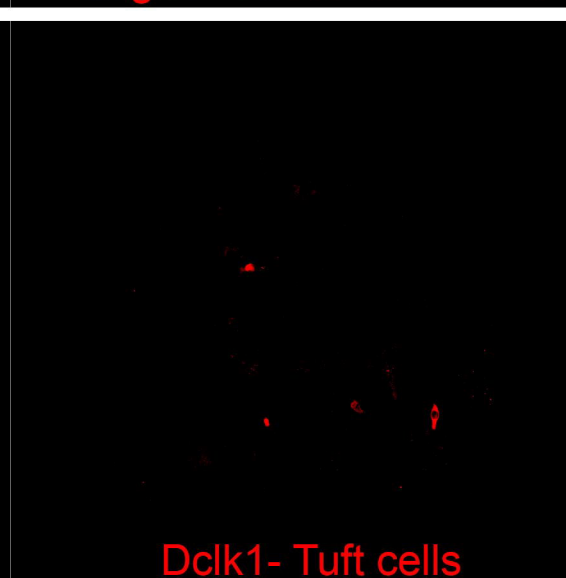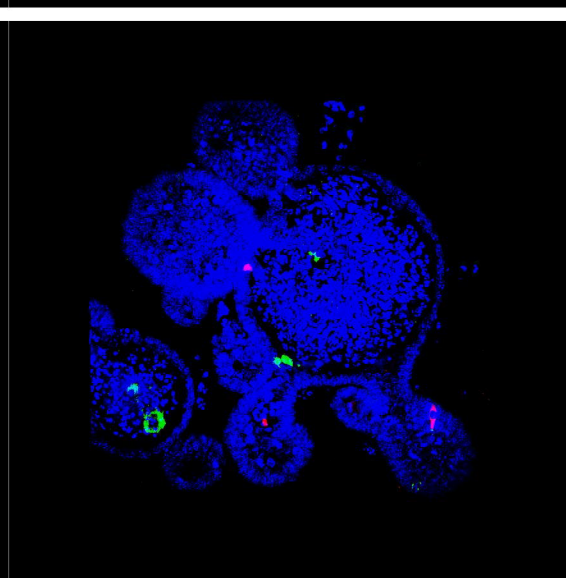

E.

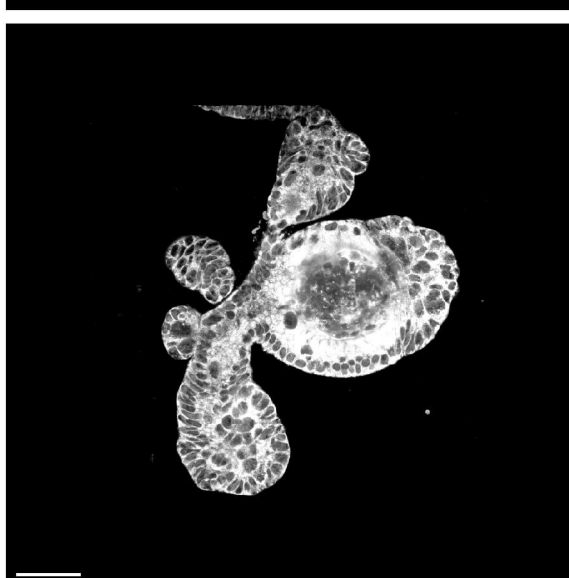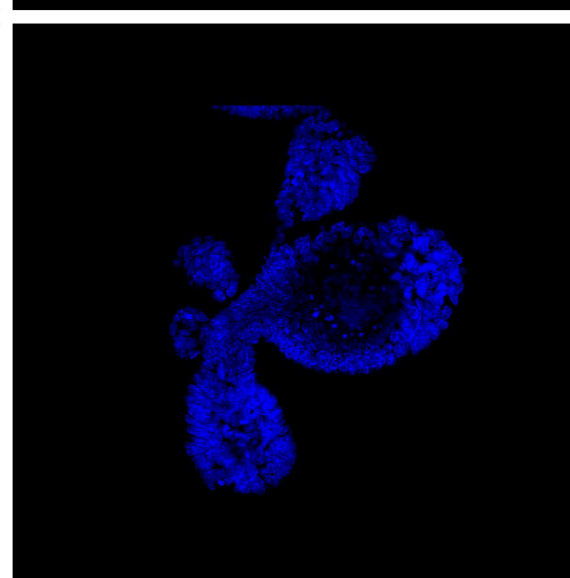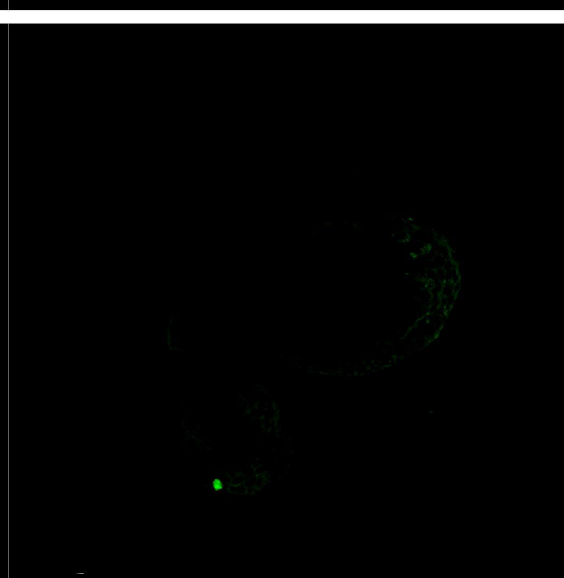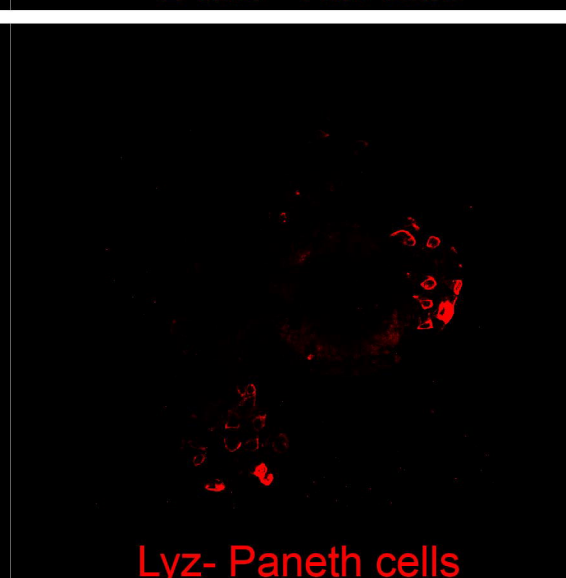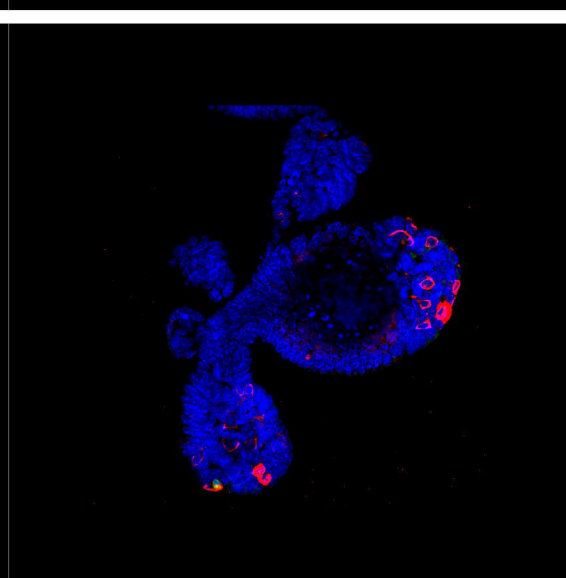

Preprint doi: <https://doi.org/10.1101/2020.05.11.087684>; this version posted May 11, 2020. The copyright holder for this preprint (which was not certified by peer review) is the author/funder, who has granted bioRxiv a license to display the preprint in perpetuity. It is made available under aCC-BY-NC-ND 4.0 International license.



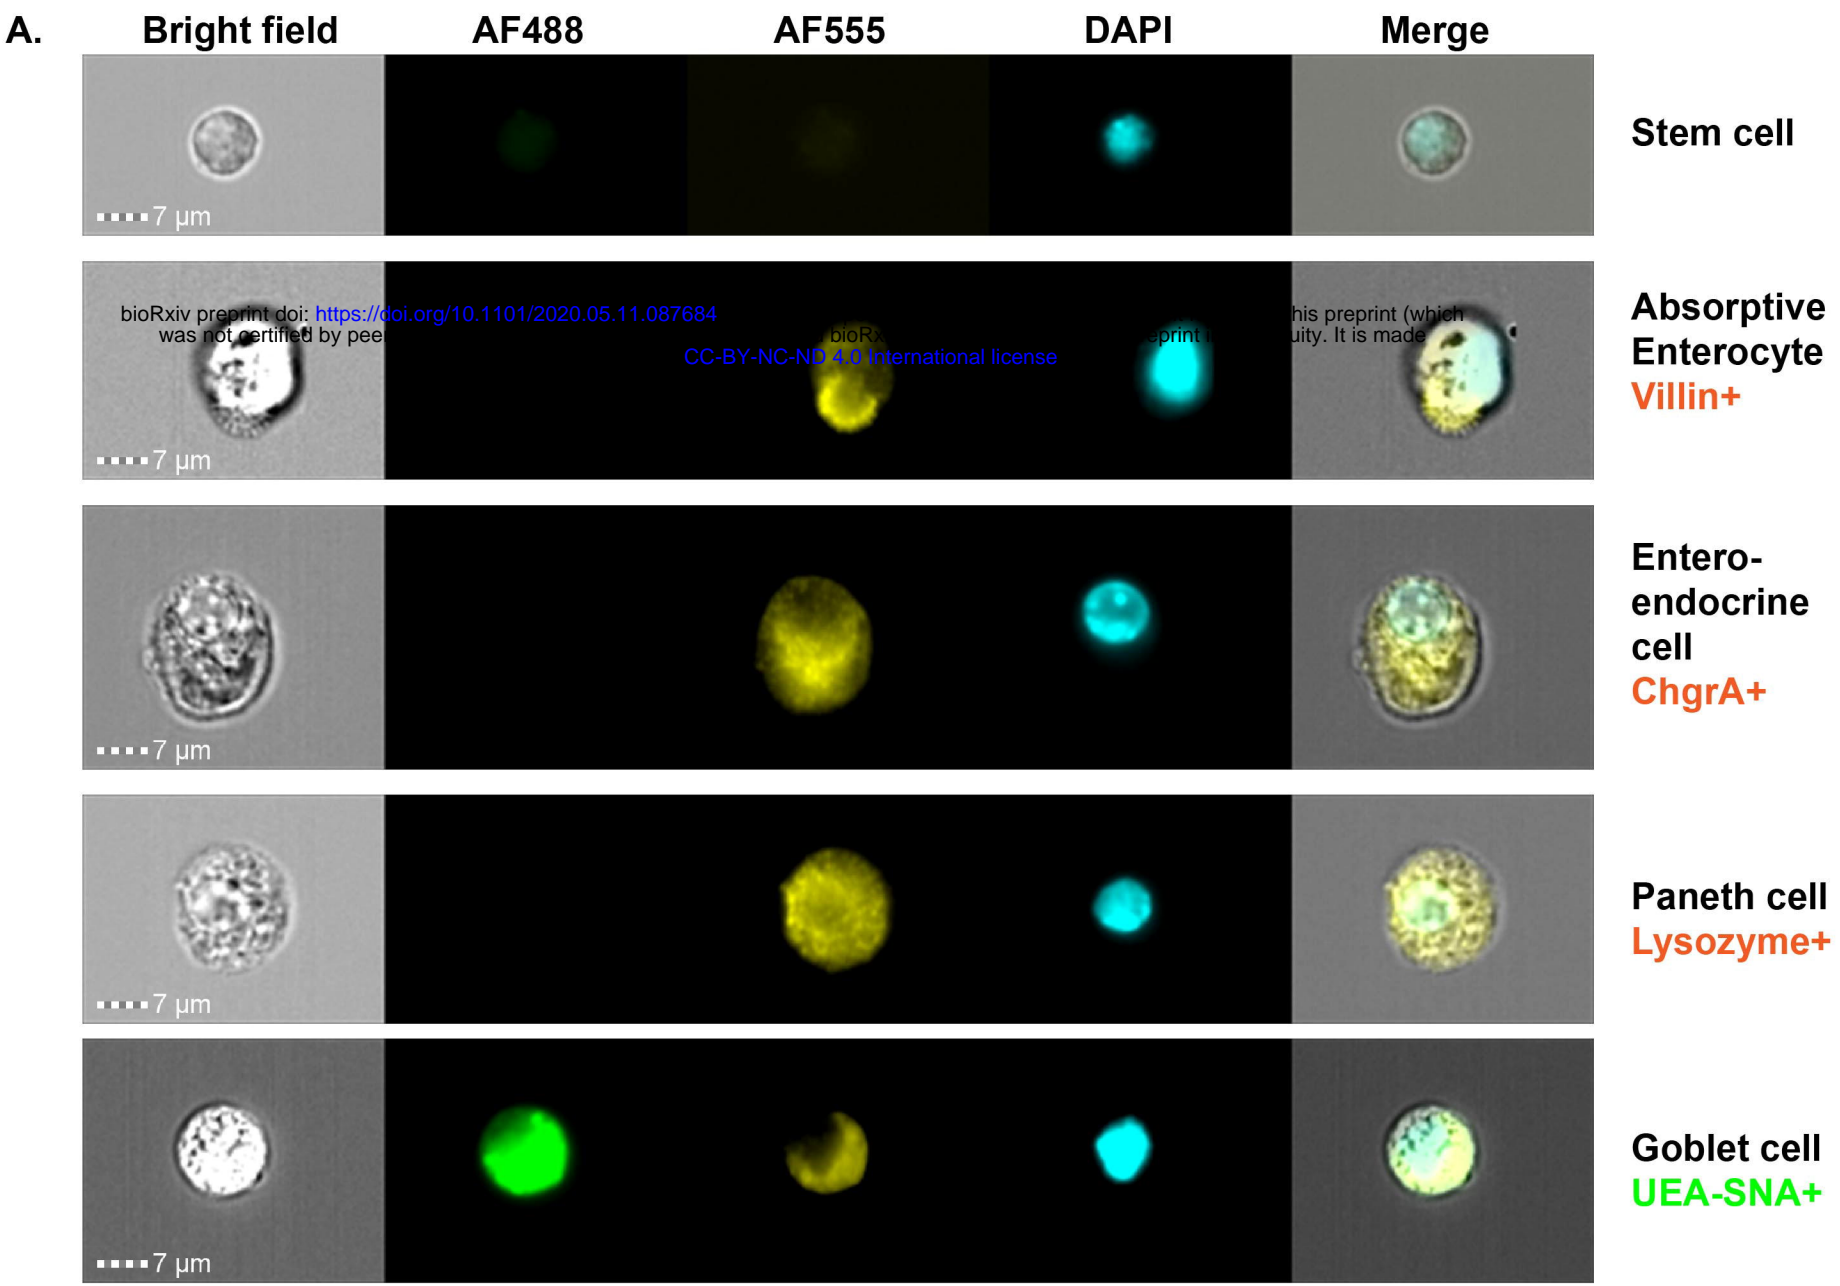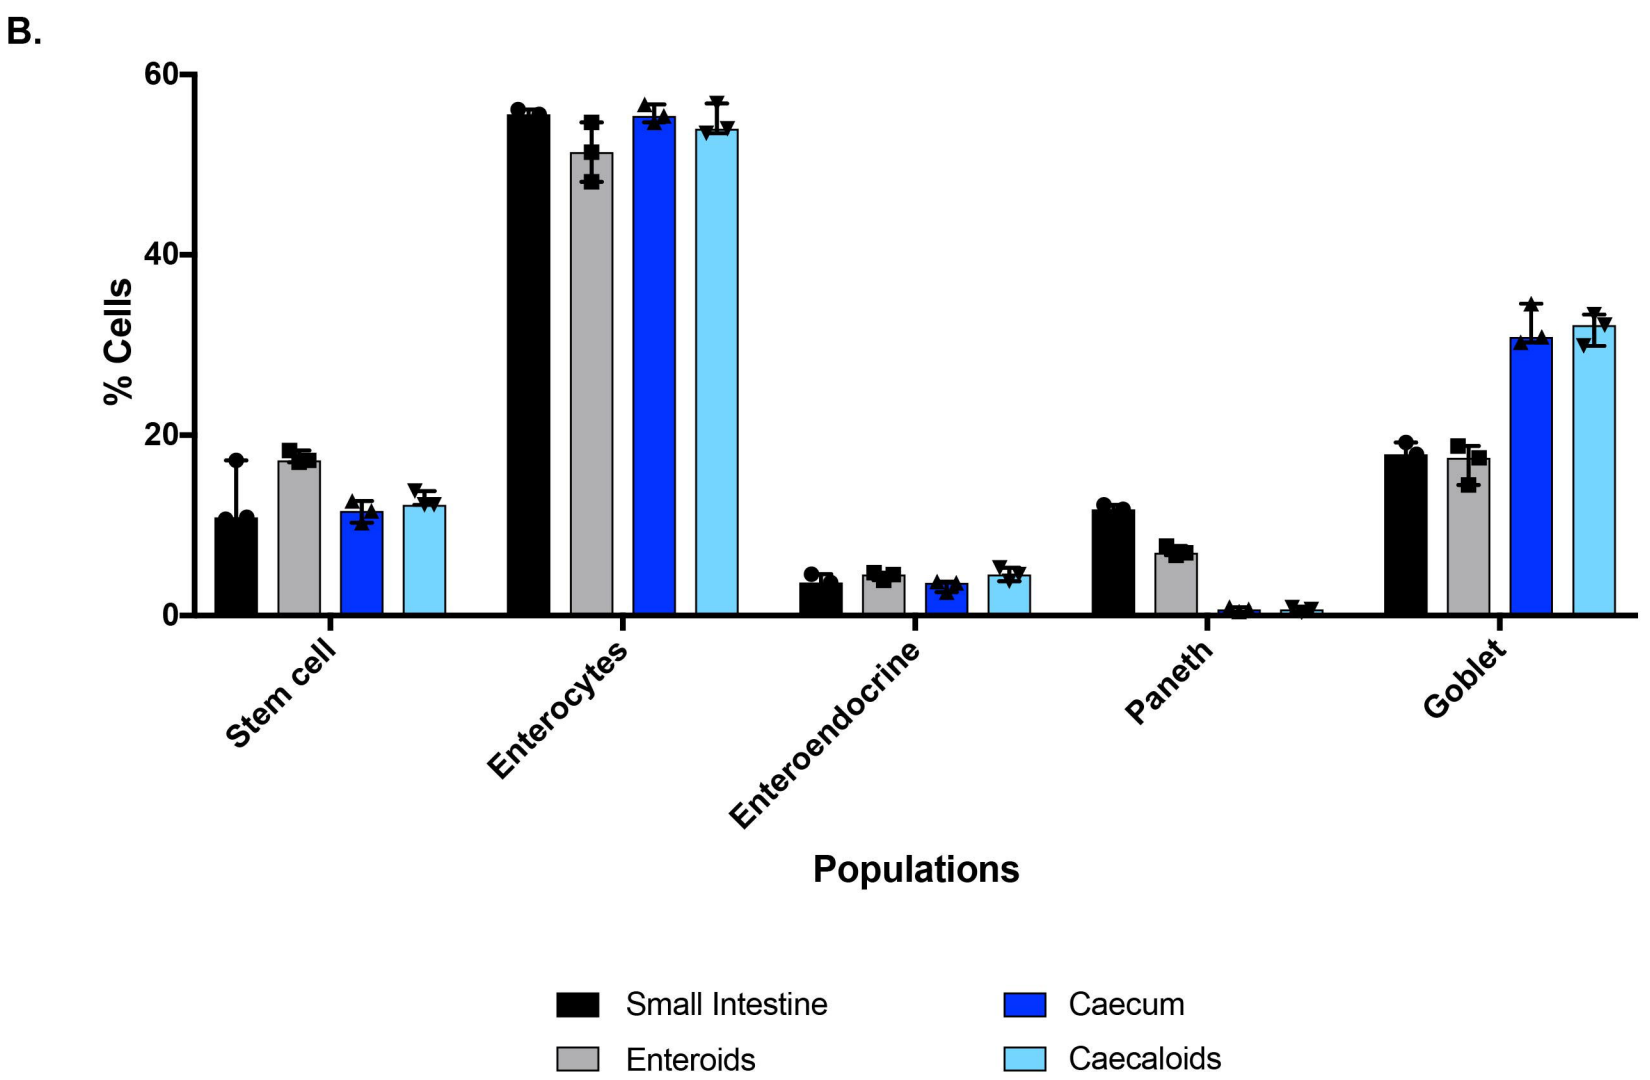

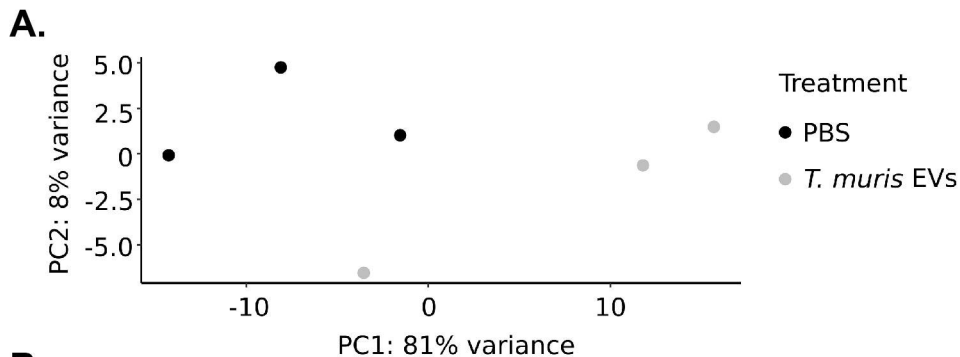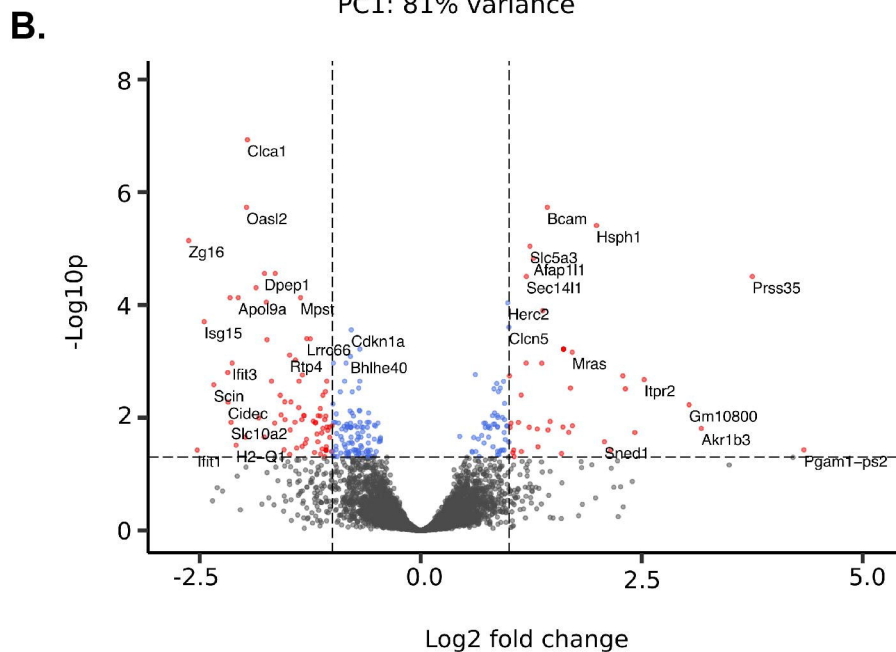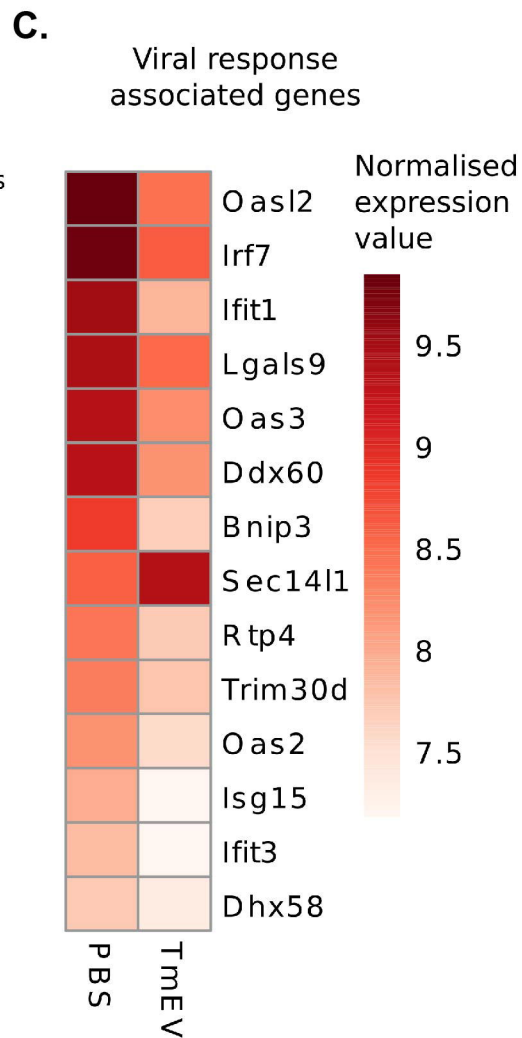



DAPI-Nuclei

Lyz- Paneth cells

DID - Membranes

Merge

**A.**

Small Intestine

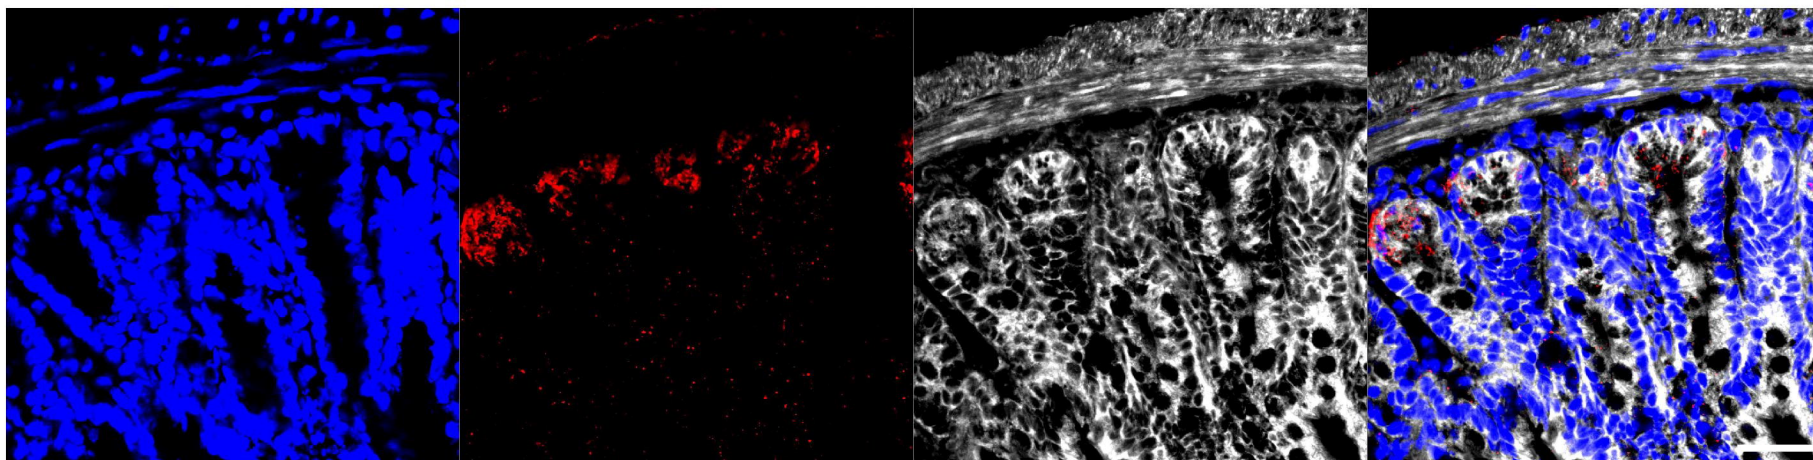

Enteroid

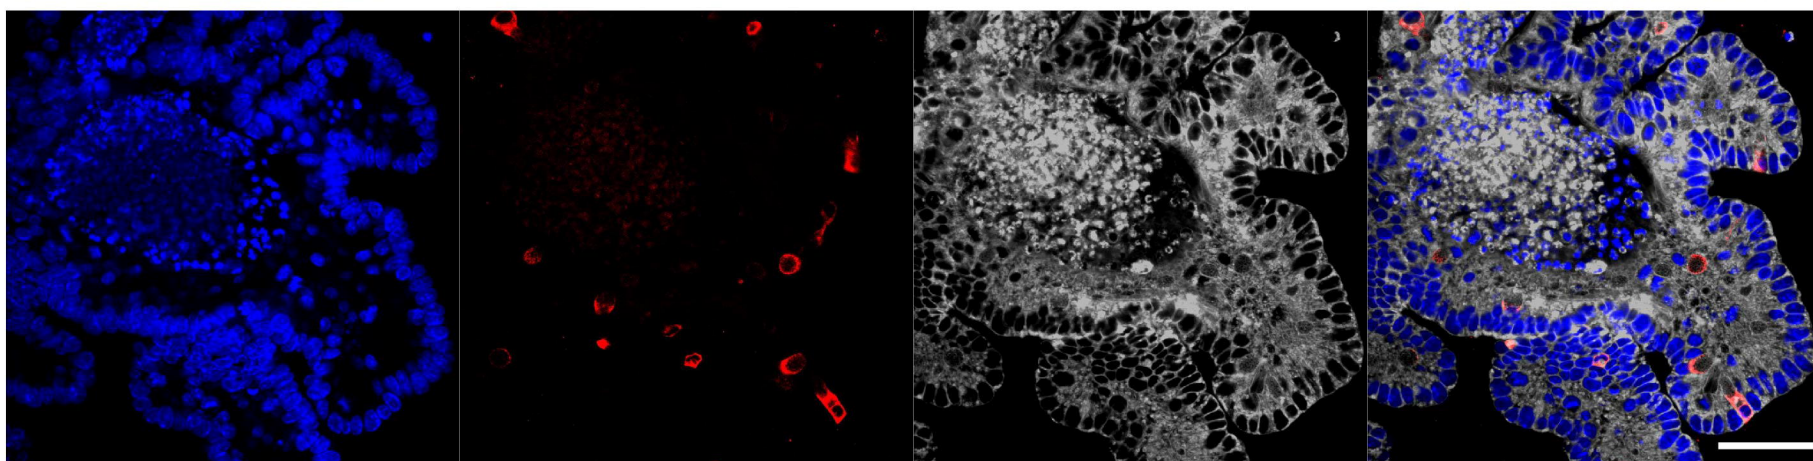**B.**

Caecum

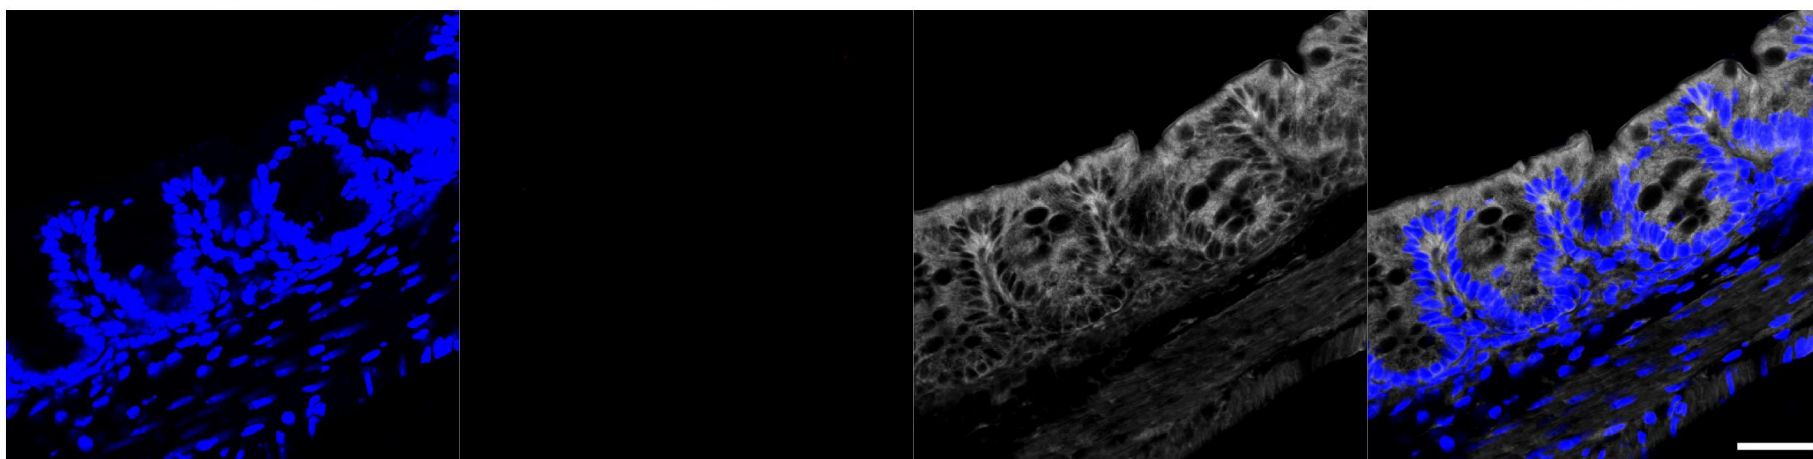

Caecaloid

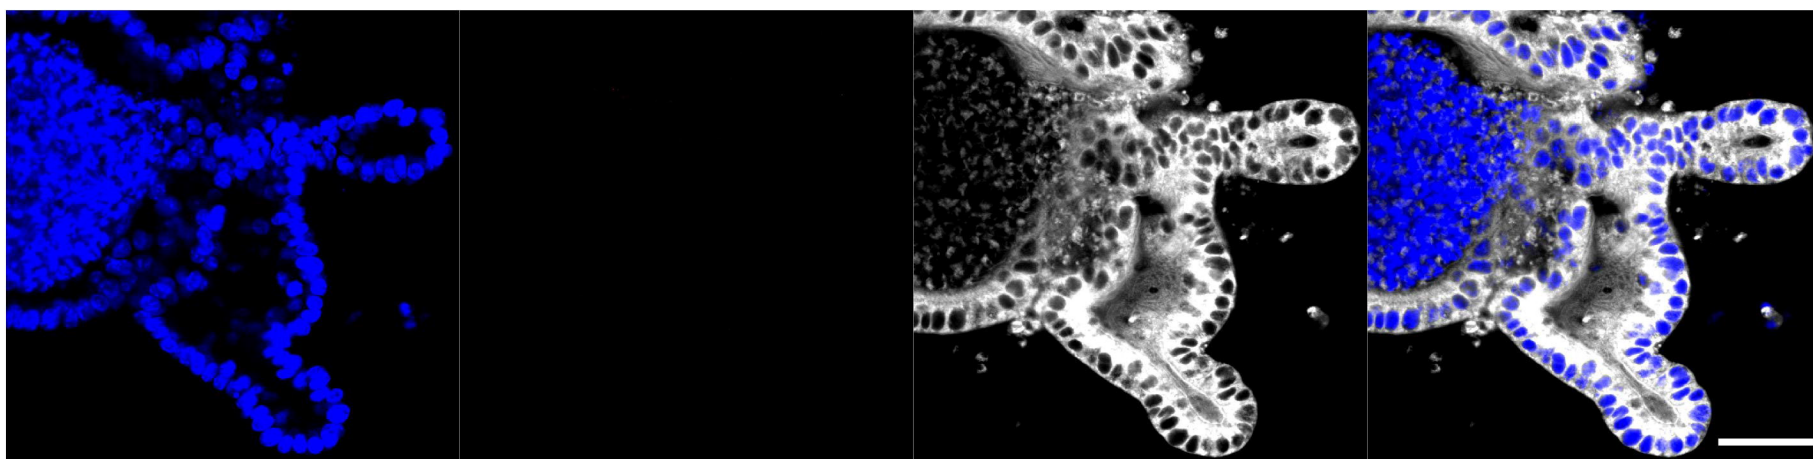



**A.**

### *Trichuris muris* EVs

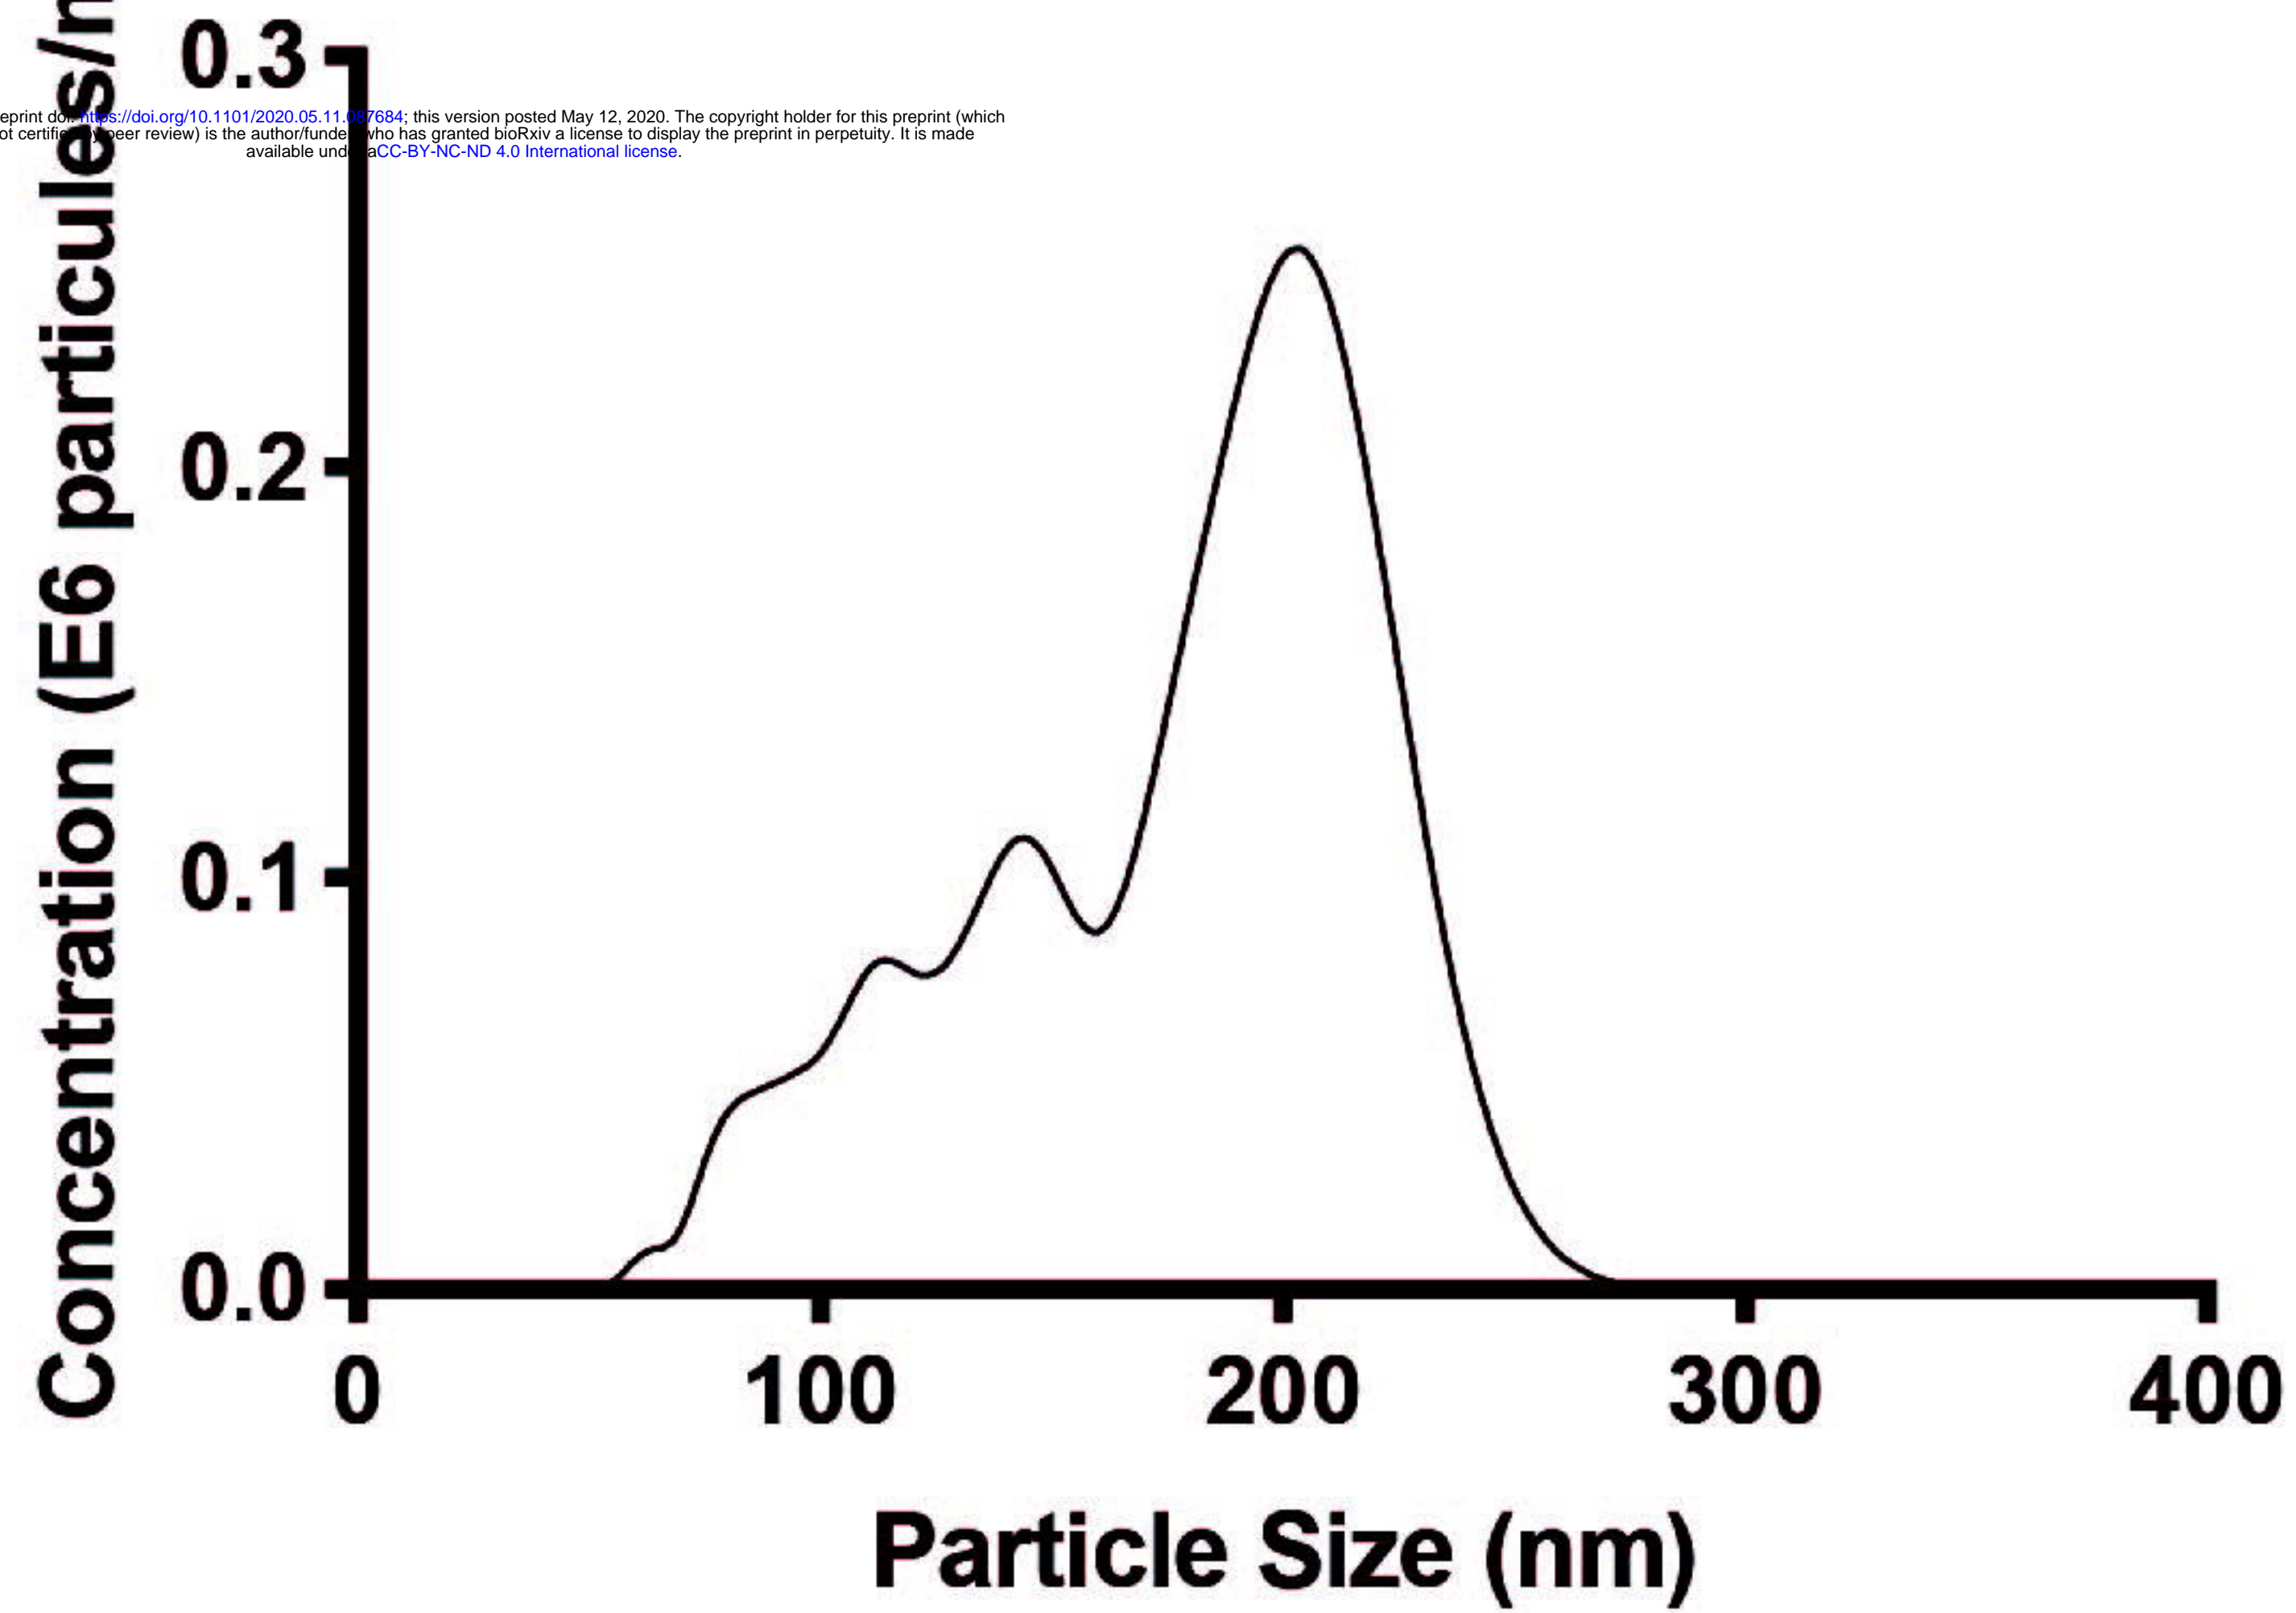**B.**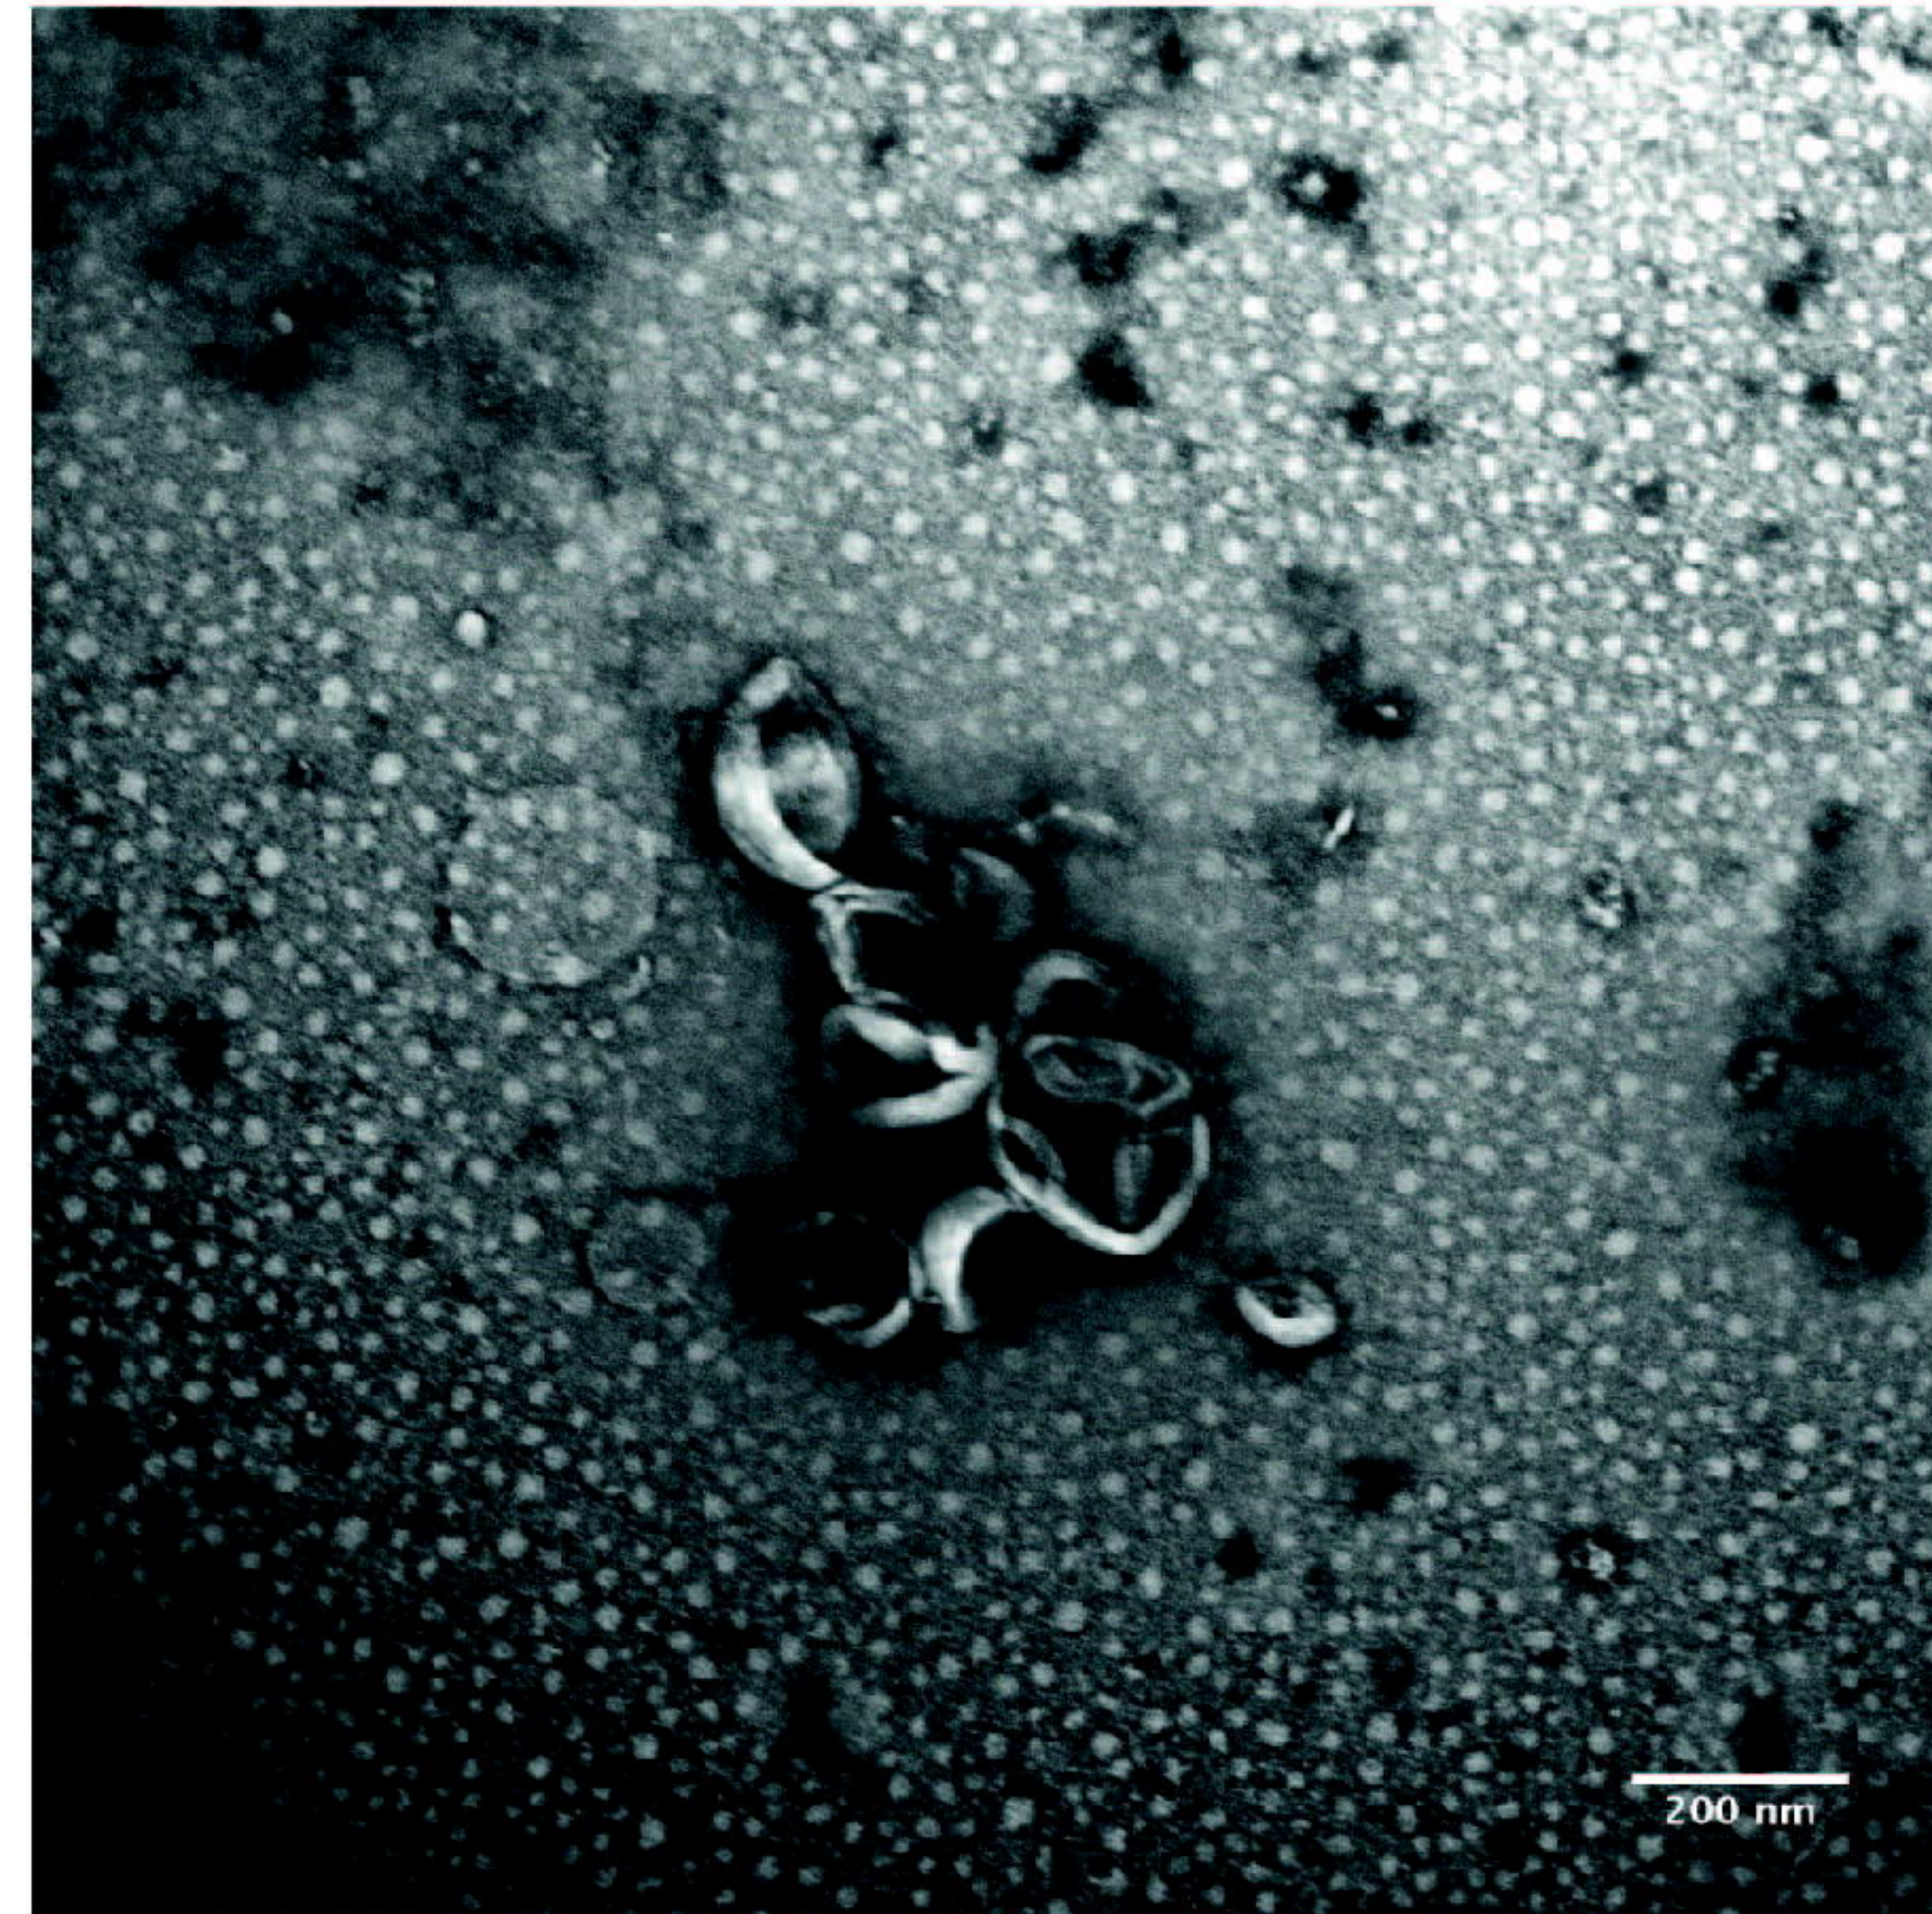



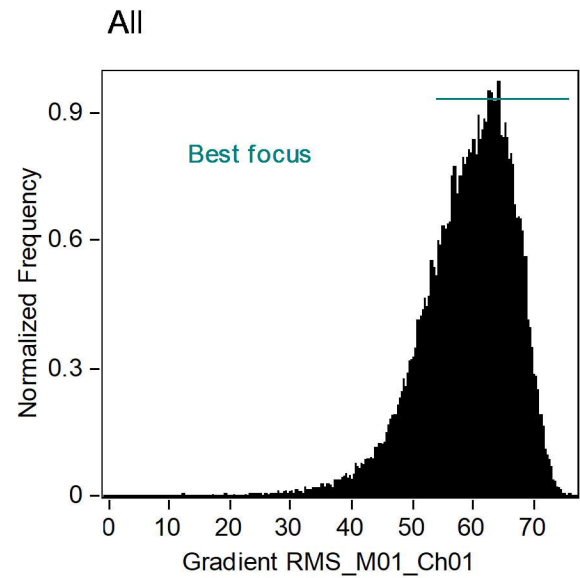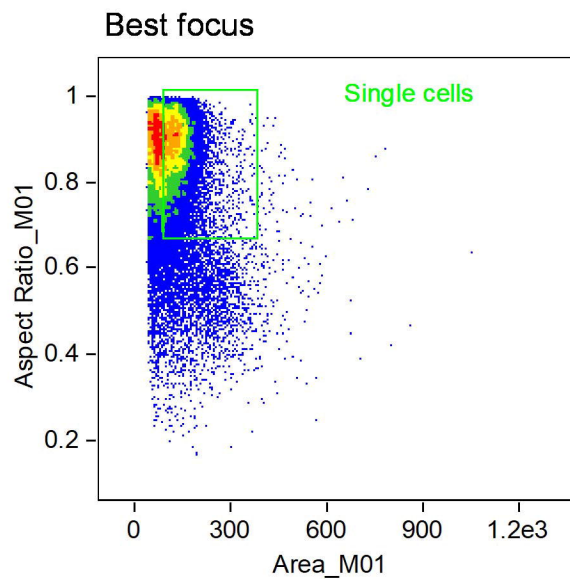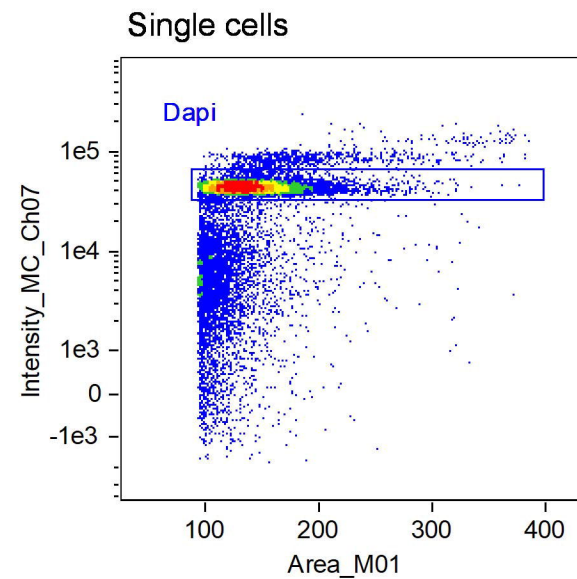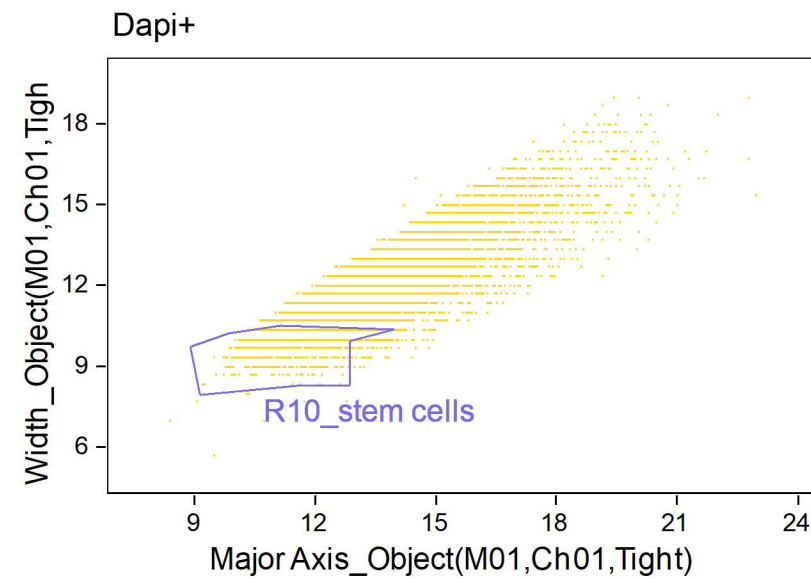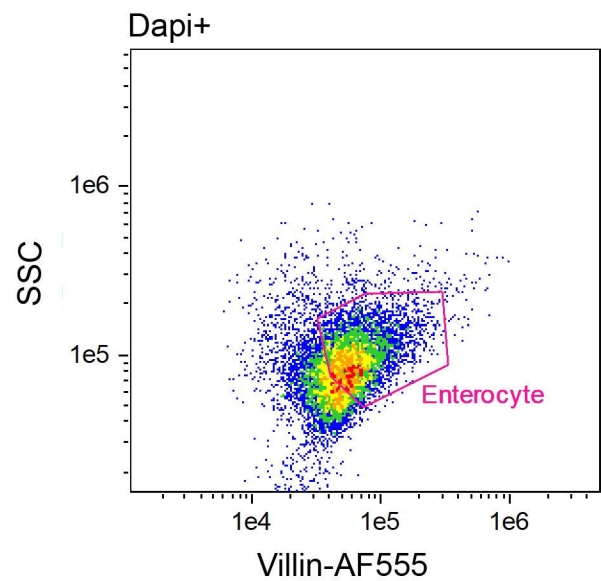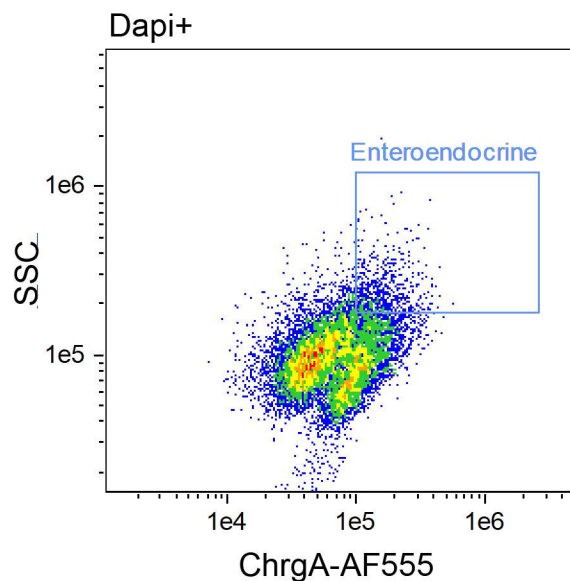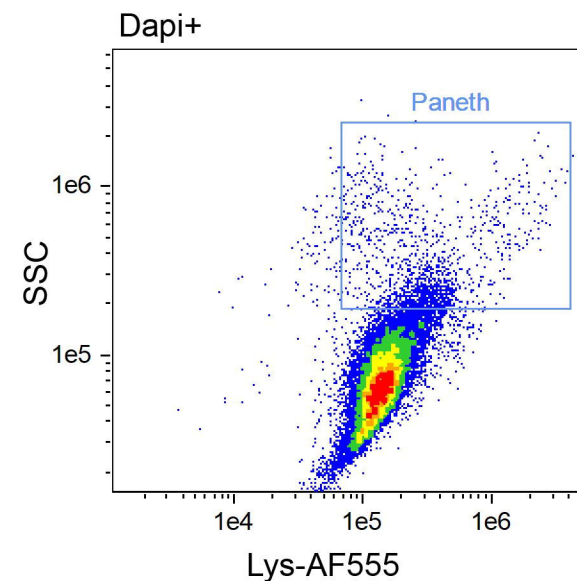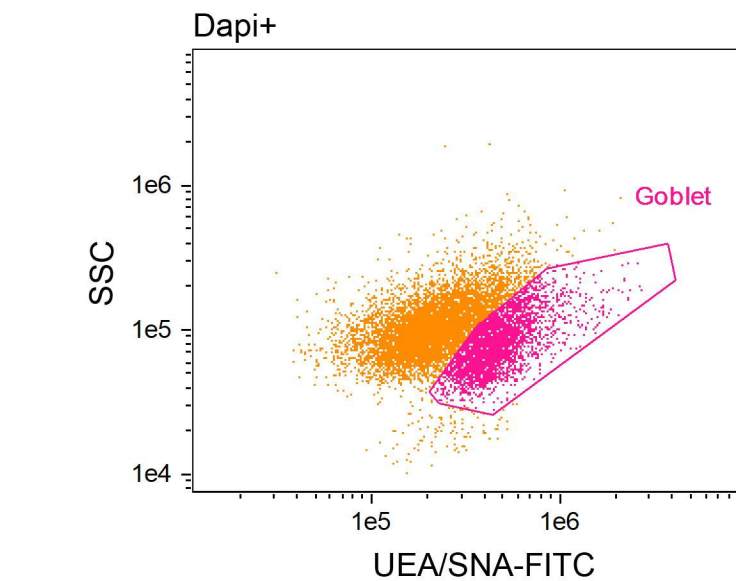

Source: https://biorxiv.org/content/10.1101/2020.05.11.087684v1.full.pdf
